# Supplementary material for: Holocene aridification trend interrupted by millennial- and centennial-scale climate fluctuations from a new sedimentary record from Padul (Sierra Nevada, southern Iberian Peninsula)
Source: Copernicus journal article supplement (doi:10.5194/cp-2017-104), 2017-08-24
Supplement: Supplementary file 1 [file cp-2017-104-supplement.pdf]

## Supplementary Information 1: Padul-15-05 and Padul-13-01

María J. Ramos-Román<sup>1</sup>, Gonzalo Jiménez-Moreno<sup>1</sup>, Jon Camuera<sup>1</sup>, Antonio García-Alix<sup>1</sup>, R. Scott Anderson<sup>2</sup>, Francisco J. Jiménez-Espejo<sup>3</sup>, José S. Carrión<sup>4</sup>

<sup>1</sup> Departamento de Estratigrafía y Paleontología, Universidad de Granada, Spain. *mjrr@ugr.es*

<sup>2</sup> School of Earth Sciences and Environmental Sustainability, Northern Arizona University, USA.

<sup>3</sup> Department of Biogeochemistry, Japan Agency for Marine-Earth Science and Technology (JAMSTEC), Japan.

<sup>4</sup> Departamento de Biología Vegetal, Facultad de Biología, Universidad de Murcia, Murcia, Spain.

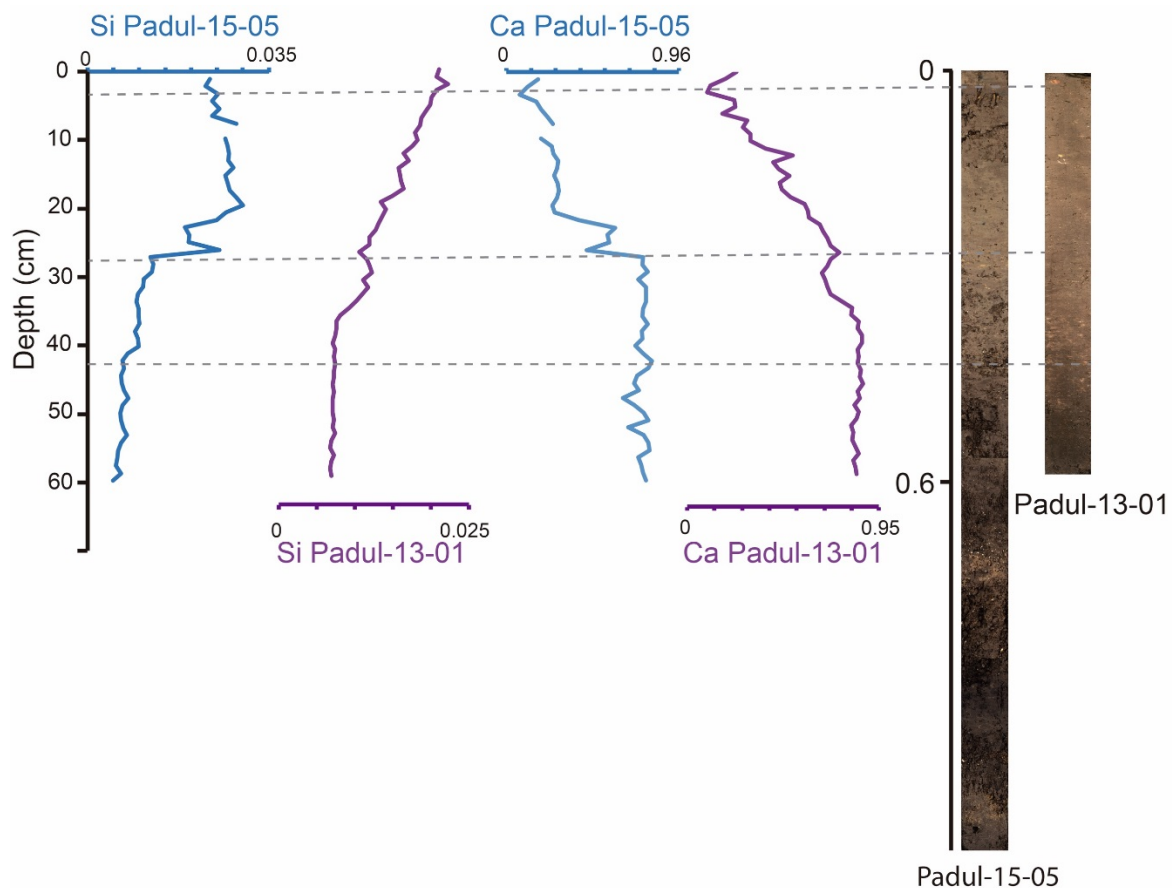

**Figure S1:** Lithological and geochemical comparison between the upper part of the Padul-15-05 and the Padul-13-01 records.
