# Supplementary material for: Holocene aridification trend interrupted by millennial- and centennial-scale climate fluctuations from a new sedimentary record from Padul (Sierra Nevada, southern Iberian Peninsula)
Source: Copernicus journal article supplement (doi:10.5194/cp-2017-104), 2017-08-24
Supplement: Supplementary file [file cp-2017-104-RC3-supplement.pdf]

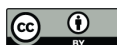

1 **Holocene aridification trend interrupted by millennial- and centennial-scale climate**  
2 **fluctuations from a new sedimentary record from Padul (Sierra Nevada, southern Iberian**  
3 **Peninsula)**

4 María J. Ramos-Román<sup>1</sup>, Gonzalo Jiménez-Moreno<sup>1</sup>, Jon Camuera<sup>1</sup>, Antonio García-Alix<sup>1</sup>, R.  
5 Scott Anderson<sup>2</sup>, Francisco J. Jiménez-Espejo<sup>3</sup>, José S. Carrión<sup>4</sup>

6 <sup>1</sup> Departamento de Estratigrafía y Paleontología, Universidad de Granada, Spain

7 <sup>2</sup> School of Earth Sciences and Environmental Sustainability, Northern Arizona University,  
8 USA.

9 <sup>3</sup> Department of Biogeochemistry, Japan Agency for Marine-Earth Science and Technology  
10 (JAMSTEC), Japan.

11 <sup>4</sup> Departamento de Biología Vegetal, Facultad de Biología, Universidad de Murcia, Murcia,  
12 Spain.

13 *Correspondence to:* María J. Ramos-Román ([mjrr@ugr.es](mailto:mjrr@ugr.es))

14 **Abstract.** Holocene centennial-scale paleoenvironmental variability has been described in a  
15 multiproxy analysis (i.e. lithology, geochemistry, macrofossil and microfossil analyses) of a  
16 paleoecological record from the Padul basin in Sierra Nevada, southern Iberian Peninsula. This  
17 sequence covers a relevant time interval hitherto unreported in the studies of the Padul  
18 sedimentary sequence. The ca. 4700 yr-long record has preserved proxies of climate variability,  
19 with vegetation, lake levels and sedimentological change the Holocene in one of the most unique  
20 and southernmost peat bogs from Europe. The progressive Middle and Late Holocene trend  
21 toward arid conditions identified by numerous authors in the western Mediterranean region,  
22 mostly related to a decrease in summer insolation, is also documented in this record, being here  
23 also superimposed by centennial-scale variability in humidity. In turn, this record shows  
24 centennial-scale climate oscillations in temperature that correlate with well-known climatic  
25 events during the Late Holocene in the western Mediterranean region, synchronous with  
26 variability in solar and atmospheric dynamics. The multiproxy Padul record first shows a  
27 transition from a relatively humid Middle Holocene in the western Mediterranean region to more  
28 aridity from ~4700 to ~2800 cal yr BP. A relatively warm and humid period occurred between  
29 ~2600 to ~1600 cal yr BP, coinciding with persistent negative NAO conditions and the historic  
30 Iberian-Roman Humid Period. Enhanced arid conditions, co-occurring with overall positive  
31 NAO conditions and increasing solar activity, are observed between ~1550 to ~450 cal yr BP  
32 (~400 to ~1400 CE) and colder and warmer conditions happened during the Dark Ages and  
33 Medieval Climate Anomaly, respectively. Slightly wetter conditions took place during the end of  
34 the MCA and the first part of the Little Ice Age, which could be related to a change towards  
35 negative NAO conditions and minima in solar activity. Evidences of higher human impact in the  
36 Padul peat bog area are observed in the last ~1550 cal yr BP. Time series analysis performed  
37 from local (*Botryococcus* and TOC) and regional signals (Mediterranean forest) helped us  
38 determining the relationship between southern Iberian climate evolution, atmospheric, oceanic  
39 dynamics and solar activity.

40 **Keywords:** Holocene, Padul, peat bog, North Atlantic Oscillation, atmospheric dynamics,  
41 southern Iberian Peninsula, Sierra Nevada, western Mediterranean.



## 42 1 Introduction

43 The Mediterranean area is situated in a sensitive region between temperate and subtropical  
44 climates making it an important place to study the connections between atmospheric and oceanic  
45 dynamics and environmental changes. Climate in the western Mediterranean and the southern  
46 Iberian Peninsula is influenced by several atmospheric and oceanic dynamics (Alpert et al.,  
47 2006), including the North Atlantic Oscillation (NAO) one of the principal atmospheric  
48 phenomenon controlling climate in the area (Hurrell, 1995; Moreno et al., 2005). Recent NAO  
49 reconstructions in the western Mediterranean region relate negative and positive NAO conditions  
50 with an increase and decrease in winter (effective) precipitation, respectively (e.g. Olsen et al.,  
51 2012; Trouet et al., 2009). Numerous paleoenvironmental studies in the western Mediterranean  
52 have detected a link at millennial- and centennial-scales between the oscillations of paleoclimate  
53 proxies studied in sedimentary records with solar variability and atmospheric (i.e., NAO) and/or  
54 ocean dynamics during the Holocene (e.g. Fletcher et al., 2013; Moreno et al., 2012; Rodrigo-  
55 Gámiz et al., 2014). Very few montane and low altitude lake records in southern Iberia document  
56 centennial-scale climate change [see, for example Zoñar Lake (Martín-Puertas et al., 2008)], with  
57 most terrestrial records in the western Mediterranean region evidencing only millennial-scale  
58 cyclical changes. Therefore, higher-resolution decadal-scale analyses are thus necessary in order  
59 to analyze the link between solar activity, atmospheric and oceanographic systems with  
60 terrestrial environment in this area at shorter (i.e., centennial) time scales.

61 Sediments from lakes, peat bogs and marine records from the western Mediterranean have  
62 documented an aridification trend during the Late Holocene (e.g. Carrión et al., 2010b; Gil-  
63 Romera et al., 2014; Jalut et al., 2009). This trend, however, was superimposed by shorter-term  
64 climate variability, as shown by several recent studies from the region, as well as human pressure  
65 (Carrión, 2002; Fletcher et al., 2013; Jiménez-Moreno et al., 2013; Martín-Puertas et al., 2008;  
66 Ramos-Román et al., 2016). This relationship between climate variability, culture evolution and  
67 human impact during the Late Holocene has also been the subject of recent paleoenvironmental  
68 studies (Carrión et al., 2007; Lillios et al., 2016; López-Sáez et al., 2014; Magny, 2004).  
69 However, it is still unclear what has been the main forcing driving environmental change (i.e.,  
70 deforestation) in this area during this time: was it climate or humans?

71 Within the western Mediterranean region, Sierra Nevada is the highest and southernmost  
72 mountain range in the Iberian Peninsula and thus presents a critical area for paleoenvironmental  
73 studies. Most high-resolution studies there have come from high elevation sites. The well-known  
74 Padul peat bog site is located at the western foot of the Sierra Nevadas (Fig. 1) and bears one of  
75 the longest continental records in southern Europe, with a sedimentary sequence of ca. 100 m  
76 thick that could represent the last 1 Ma (Ortiz et al., 2004). Several research studies, including  
77 radiocarbon dating, geochemistry and pollen analyses, have been carried out on previous cores  
78 from Padul, and have documented glacial/interglacial cycles during the Pleistocene and up until  
79 the Middle Holocene. However, the Late Holocene section of the Padul sedimentary sequence  
80 has never been retrieved and studied. This was due to the location of these previous corings  
81 within the peat mine exploitation setting, where the upper (and non productive) part of the  
82 sedimentary sequence was missing (Florschütz et al., 1971; Ortiz et al., 2004; Pons and Reille,  
83 1988).

84 Here we present a new record from the Padul peat bog basin: Padul-15-05, a 42.64 m-long  
85 sediment core that, for the first time, contains a continuous record of the Late Holocene (Fig. 2).  
86 A high-resolution multi-proxy analysis of the upper 1.15 m, the past ~4700 cal yr BP, has  
87 allowed us to determine a complete paleoenvironmental and paleoclimatic record at centennial-



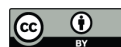

88 and millennial-scales. To accomplish that, we reconstructed changes in the Padul peat bog  
89 vegetation, ~~sedimentation~~, climate and human impact during the Holocene throughout the  
90 interpretation of the lithology, palynology and geochemistry.  
91 Specifically, the main objective of this paper is to determine environmental variability and  
92 climate evolution in the southern Iberian Peninsula and the western Mediterranean region and  
93 their linkages to northern hemisphere climate and solar variability during the Holocene. In order  
94 to do this, we compared our results with other paleoclimate records from regional areas and solar  
95 activity from the northern hemisphere for the past ca. 4.7 ka BP (Bond et al., 2001; Laskar et  
96 al., 2004; Sicre et al., 2016; Steinhilber et al., 2009).

## 97 2 Study site

### 98 2.1 Regional setting: Sierra Nevada climate and vegetation

99 Sierra Nevada is a W-E aligned mountain range located in Andalusia (southern Spain). Climate  
100 in this area is Mediterranean, with cool and humid winters and hot/warm summer drought. In the  
101 Sierra Nevada, the mean annual temperature at approximately 2500 m asl is 4.5 °C and the mean  
102 annual precipitation is 700 mm/yr (Oliva et al., 2009). Sierra Nevada is strongly influenced by  
103 thermal and precipitation variations due to the altitudinal gradient (from ca. 700 to more than  
104 3400 m), which control plant taxa distribution in different bioclimatic vegetation belts due to the  
105 variability in thermotypes and ombrotypes (Valle Tendero, 2004). According to the  
106 climatophilous series classification, Sierra Nevada is divided in four different vegetation belts  
107 (Fig. 1). The crioromediterranean vegetation belt, occurring above ~2800 m, is characterized  
108 principally by *Festuca clementei*, *Hormatophylla purpurea*, *Erigeron frigidus*, *Saxifraga*  
109 *nevadensis*, *Viola crassiuscula*, and *Linaria glacialis*. The oromediterranean belt, between ~1900  
110 to 2800 m, bears *Pinus sylvestris*, *P. nigra*, *Juniperus communis* subsp. *hemisphaerica*, *J. sabina*  
111 var. *humilis*, *J. communis* subsp. *nana*, *Genista versicolor*, *Cytisus oromediterraneus*,  
112 *Hormatophylla spinosa*, *Prunus prostrata*, *Deschampsia iberica* and *Astragalus sempervirens*  
113 subsp. *nevadensis* as the most representative species. The supramediterranean belt, from  
114 approximately 1400 to 1900 m of elevation, principally includes *Quercus pyrenaica*, *Q. faginea*,  
115 *Q. rotundifolia*, *Acer opalus* subsp. *granatense*, *Fraxinus angustifolia*, *Sorbus torminalis*,  
116 *Adenocarpus decorticans*, *Helleborus foetidus*, *Daphne gnidium*, *Clematis flammula*, *Cistus*  
117 *laurifolius*, *Berberis hispanicus*, *Festuca scariosa*, *Thymus serpylloides* subsp. *gadoriensis*,  
118 *Helichrysum italicum* subsp. *serotinum*, *Santolina rosmarinifolia* subsp. *canescens* and *Artemisia*  
119 *glutinosa*. The mesomediterranean vegetation belt occurs between ~600 and 1400 m of elevation  
120 and is characterized by *Quercus rotundifolia*, *Retama sphaerocarpa*, *Paeonia coriacea*,  
121 *Juniperus oxycedrus*, *Rubia peregrina*, *Asparagus acutifolius*, *D. gnidium*, *Ulex parviflorus*,  
122 *Genista umbellata*, *Cistus albidus* and *C. laurifolius* (Al Aallali et al., 1998; Valle, 2003). The  
123 human impact over this area, especially important during the last millennium, affected the  
124 natural vegetation distribution through fire, deforestation, cultivation. (i.e., *Olea*) and subsequent  
125 reforestation (mostly *Pinus*) (Anderson et al., 2011).

### 126 2.2 Padul peat bog

127 The Padul basin is situated at approximately 725 m of elevation in the southeastern part of the  
128 Granada Basin, at the foothill of the southwestern Sierra Nevada, Andalucía, Spain (Fig. 1). This  
129 is one of the most seismically active areas in the southern Iberian Peninsula with numerous faults

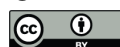

in NW-SE direction, with the Padul fault being one of these active normal faults (Alfaro et al., 2001). It is a small extensional basin approximately 12 km long and covering an area of approximately 45 km<sup>2</sup>, which is bounded by the Padul normal fault. The sedimentary in-filling of the basin consists of Neogene and Quaternary deposits; Upper Miocene conglomerates, calcarenites and marls, and Pliocene and Quaternary alluvial sediments, lacustrine and peat bog deposits (Sanz de Galdeano et al., 1998; Delgado et al., 2002; Domingo et al., 1983). The Padul peat bog is an endorheic area with a surface of approximately 4 km<sup>2</sup> placed in the Padul basin that contains a sedimentary sequence mostly characterized by peat. The basin fill is asymmetric, with thicker peat infill to the northeast (~100 m thick; Domingo-García et al., 1983; Florschütz et al., 1971; Nestares and Torres, 1997) and disappearing to the southwest (Alfaro et al., 2001). The main source area of the sediments in the Padul peat bog is Sierra Nevada, which is characterized at higher elevations by Paleozoic siliceous metamorphic rocks (mostly mica-schists and quartzites) from the Nevado-Filabride complex and, at lower elevations and acting as bedrock, by Triassic dolomites, limestones and phyllites from the Alpujárride Complex (Sanz de Galdeano et al. 1998). Geochemistry in the Padul sediments is influenced by detritic materials coming from the neighboring mountains, mainly the Sierra Nevada mountain range (Ortiz et al., 2004). In addition, groundwater inputs into the Padul basin are the main reason why there is a wetland in this area. These inputs come from the Triassic carbonates aquifers (N and S edge to the basin), the out-flow of the Granada Basin (W) and the conglomerate aquifer to the east edge (Castillo Martín et al., 1984; Ortiz et al., 2004). The main water output is by evaporation and evapotranspiration, water wells and by canals (“madres”) that drain the water to the Dúrcal river to the southeast (Castillo Martín et al., 1984). Climate in the Padul area is characterized by a mean annual temperature of 14.4 °C and a mean annual precipitation of 445 mm (<http://www.aemet.es/>).

Vegetation in the Padul area is dominated by *Q. rotundifolia* (and in less amounts *Q. faginea*), which is normally accompanied by *Pistacia terebinthus*. Shrub species in the area include *Juniperus oxycedrus*, *Crataegus monogyna*, *Daphne gnidium* and *Ruscus aculeatus*. Creepers such as *Lonicera implexa*, *Rubia peregrina*, *Hedera helix*, *Asparagus acutifolius* also occur in this area and some herbs, such as *Paeonia broteroi*. *Quercus coccifera* also occurs in crests and very sunny rocky outcrops. *Retama sphaerocarpa* and *Genista cinerea* subsp. *speciosa* and the *Thymo-Stipetum tenacissime* series also occur in sunny areas and in more xeric soils. Nitrophilous communities occur in soils disrupted by livestock, pathways or open forest, normally related with anthropization (Valle, 2003).

The Padul-15-05 drilling site was located around 50 m south of the present-day Padul lake shore area. This basin area is presently subjected to seasonal water level fluctuations and is principally dominated by *Phragmites australis* (Poaceae). The lake environment is dominated by aquatic and wetland communities with *Chara vulgaris*, *Myriophyllum spicatum*, *Potamogeton pectinatus*, *Potamogeton coloratus*, *Phragmites australis*, *Typha dominguensis*, *Apium nodiflorum*, *Juncus subnodulosus*, *Carex hispida*, *Juncus bufonius* and *Ranunculus muricatus* between others (Pérez Raya and López Nieto, 1991). Some sparse riparian trees occur in the northern lake shore, such as *Populus alba*, *Populus nigra*, *Salix* sp., *Ulmus minor* and *Tamarix*.

### 3 Material and methods

Two sediment cores, Padul-13-01 (37°00'40''N; 3°36'13''W) and Padul-15-05 (37°00'39.77''N; 3°36'14.06''W) with a length of 58.7 cm and 42.64 m, respectively, were collected between 2013 and 2015 from the peat bog (Fig. 1). The cores were taken using a Rolatec RL-48-L drilling

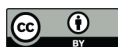

175 machine equipped with a hydraulic piston corer from the Scientific Instrumentation Centre of the  
176 University of Granada. The sediment cores were wrapped in film, put in core boxes, transported  
177 and stored in a dark cool room at +4°C.

### 178 3.1 Age-depth model (AMS radiocarbon dating)

179 The core chronology was constrained using fourteen AMS radiocarbon dates from plant remains  
180 and organic bulk samples taken throughout the cores (Table 1). In addition, one sample with  
181 gastropods was also measured for AMS radiocarbon analysis, although it was rejected due to  
182 important reservoir effect, which provide a very old date. Thirteen of these samples came from  
183 Padul-15-05 and one from the nearby Padul-13-01 (Table 1). We were able to use this date from  
184 Padul-13-01 core as there is a very significant correlation between the upper part of Padul-15-05  
185 and Padul-13-01 cores, shown by identical lithological and geochemical changes (Supplementary  
186 information 1; Figure S1). The age model for the upper ~3 m ~~until 21 cm from the surface~~ was  
187 built using the R-code package ‘Clam 2.2’ (Blaauw, 2010) employing the calibration curve  
188 IntCal 13 (Reimer et al., 2013), a 95 % of confidence range, a smooth spline (type 4) with a 0.20  
189 smoothing value and 1000 iterations (Fig. 2). The chronology of the uppermost 21 cm of the  
190 record was built using a linear interpolation between the last radiocarbon date and the top of the  
191 record (Present; 2015 CE). The studied interval in the present work are the uppermost 115 cm of  
192 the record that are constrained by six AMS radiocarbon dates (Fig. 2).

### 193 3.2 Lithology, MS, XRF and TOC

194 The length for the Padul-15-05 core is ~ 43 m. In this study, we focus in the uppermost ~ 115 cm  
195 from that core. Padul-15-05 core was split longitudinally and was described in the laboratory  
196 with respect to lithology and color (Fig. 3).  
197 Magnetic susceptibility (MS) was measured with a Bartington MS3 operating with a MS2E  
198 sensor. MS measurements (in SI units) were obtained directly from the core surface every 0.5 cm  
199 (Fig. 3).  
200 Elemental geochemical composition was measured in an X-Ray fluorescence (XRF) Avaatech  
201 core scanner® at the University of Barcelona (Spain). A total of thirty-three chemical elements  
202 were measured in the XRF core scanner at 10 mm of spatial resolution, using 10 s count time, 10  
203 kV X-ray voltage and a X-ray current of 650 µA for lighter elements and 35 s count time, 30 kV  
204 X-ray voltage, X-ray current of 1700 µA for heavier elements. Thirty-three chemical elements  
205 were measured but only the most representative with a major number of counts were considered  
206 (Si, K, Ca, Ti, Fe, Zr, Br and Sr). Results for each element are expressed as intensities in counts  
207 per second (cps) and normalized (norm.) for the total sum in cps in every measure (Fig. 3).  
208 Total organic carbon (TOC) was analyzed every 2 or 3 cm throughout the core. Samples were  
209 previously decalcified with 1:1 HCl in order to eliminate the carbonate fraction. The percentage  
210 of organic Carbon (OC %) was measured in an Elemental Analyzer Thermo Scientific Flash  
211 2000 model from the Scientific Instrumentation Centre of the University of Granada (Spain).  
212 Percentage of TOC per gram of sediment was calculated from the percentage of organic carbon  
213 (OC %) yielded by the elemental analyzer, and recalculated by the weight of the sample prior to  
214 decalcification (Fig. 3).

### 215 3.3 Pollen and NPP



216 Samples for pollen analysis ( $1-3 \text{ cm}^3$ ) were taken every 1 cm throughout the core. Pollen  
217 extraction methods followed a modified Faegri and Iversen (1989) methodology. Processing  
218 included the addition of *Lycopodium* spores for calculation of pollen concentration. Sediment  
219 was treated with NaOH, HCl, HF and the residue was sieved at 250  $\mu\text{m}$  previous to an acetolysis  
220 solution. Counting was performed using a transmitted light microscope at 400 magnifications to  
221 an average pollen count of ca. 260 terrestrial pollen grains. Fossil pollen was identified using  
222 published keys (Beug, 1961) and modern reference collections at University of Granada (Spain).  
223 Pollen counts were transformed to pollen percentages based on the terrestrial pollen sum,  
224 excluding aquatics. The palynological zonation was executed by cluster analysis using twelve  
225 different pollen taxa- *Olea*, *Pinus* undifferentiated, deciduous *Quercus*, evergreen *Quercus*,  
226 *Pistacia*, Ericaceae, *Artemisia*, Asteroideae, Cichorioideae, Amaranthaceae and Poaceae  
227 (Grimm, 1987) (Fig. 4). Non-pollen palynomorphs (NPP) include fungal and algal spores, and  
228 thecamoebians (testate amoebae). The NPP percentages were calculated and represented with  
229 respect to the terrestrial pollen sum (Fig. 4). Furthermore, some pollen taxa were grouped,  
230 according to present-day ecological bases, in Mediterranean forest and xerophytes (Fig. 4). The  
231 Mediterranean forest taxa is composed of *Quercus* total, *Olea*, *Phillyrea* and *Pistacia*. The  
232 xerophyte group includes *Artemisia*, *Ephedra*, and Amaranthaceae.

## 233 4 Results

### 234 4.1 Chronology and sedimentation rates

235 The age-model of the studied Padul-15-05 core (Fig. 2) shows that the top 115 cm continuously  
236 cover approximately the last ca. 4700 cal yr BP, being the age constrained by fourteen AMS  $^{14}\text{C}$   
237 dates (Table 1). Five distinct sediment accumulation rate (SAR) intervals can be differentiated  
238 between 0 and 122.96 cm based on the linear interpolation between radiocarbon dates in the  
239 studied core (Fig. 2).

### 240 4.2 Lithology, MS, XRF and TOC

241 The lithology of the upper ca. 115 cm of the Padul-15-05 sediment core was mainly deduced  
242 from a visual inspection together with the element geochemical composition (XRF) and the  
243 correlation of these data, and the MS of the split cores. In addition, this information was  
244 complemented with the TOC (Fig. 3).

245 A Linear  $r$  (Pearson) correlation was calculated for the XRF data, the correlation for the  
246 inorganic geochemical elements show us two different groups of elements that covary (Table 2):  
247 Group 1) Si, K, Ti, Fe and Zr with a high positive correlation between them; Group 2) Ca, Br  
248 and Sr have negative correlation with Group 1. The lithology for this sedimentary sequence  
249 consists in clays with variable carbonates, siliciclastics and organic content (Fig. 3). Based on  
250 this, the sequence is subdivided in two principal sedimentary units. The bottom of the record  
251 corresponds with Unit 1, characterized principally by lower values of MS and higher values of  
252 Ca. The top of the sequence can be subdivided in Unit 2, in which the mineralogical composition  
253 is lower in Ca with higher values of MS in correlation with mostly siliciclastics elements (Si, K,  
254 Ti, Fe and Zr). Within these two units, four different facies can be identified by visual inspection  
255 and by the elemental geochemical composition and TOC of the sediments. *Facies* 1, between  
256 115-110 cm depth (ca. 4700 to 4650 cal yr BP) and 89-80 cm depth (ca. 4300 to 4000 cal yr BP),  
257 are characterized by dark brown organic clays that bear charophytes and plant remains. They are



also depicted by relative higher values of TOC values (Fig. 3). *Facies* 2, between 110-89 cm depth (ca. 4650 to 4300 cal yr BP) and 80-42 cm depth (ca. 4000 to 1600 cal yr BP), are made up of brown clays, with the occurrence of gastropods and charophytes. These are also characterized with decreasing TOC values. *Facies* 3, between 42-28 cm depth (ca. 1600 to 450 cal yr BP), are characterized by grayish brown clays with the occurrence of gastropods, and lower values of TOC, the increasing trend in MS and in siliciclastic elements. *Facies* 4, between 28-0 cm/ ca. 450 cal yr BP to Present, are made up of light grayish brown clays and feature a strong increase in siliciclastic linked to a strong increase in MS.

#### 4.3 Pollen and NPP

A total of seventy-two pollen taxa were identified but only the most representative taxa are here plotted in a summary pollen diagram (Fig. 4). Selected NPP percentages are also displayed in Figure 4. Four pollen zones (Fig. 4) were visually identified with the help of a cluster analysis using the program CONISS (Grimm, 1987). Pollen zones are described below:

##### 4.3.1 Zone Padul-15-05-1 [~4720 to 3400 cal yr BP/ ~2800 to 1450 BCE (115-65 cm)]

Zone 1 is characterized by the abundance of Mediterranean forest species reaching up to ca. 70 %. Another important taxon in this zone is *Pinus*, with average values around 18 %. Herbs are largely represented by Poaceae, averaging around 10 %, and reaching up to ca. 25 %. This pollen zone is subdivided into subzones-1a, 1b and 1c (Fig. 4). The principal characteristic that differentiate subzone-1a to subzone-1b (boundary at ca. 4650 cal yr BP/ca. 2700 BCE) is the decrease in Poaceae from an average value of ca. 18 to 10 %, the increase in *Pinus* from ca. 7 to 18 %, and the appearance of cf. *Vitis*. The decrease in Mediterranean forest to average values around 40 %, the increase in *Pinus* to average values around 25 % and a progressive increase in Ericaceae with average occurrences from ca. 6 to 11 %, allow to discern subzones 1b and 1c (boundary at ca. 3950 cal yr BP).

##### 4.3.2. Zone Padul-15-05-2 [~3400 to 1550 cal yr BP/~1450 BCE to 400 CE (65-41 cm)]

The main features of this zone are the increase in Ericaceae up to ca. 16 % and in deciduous *Quercus*, reaching values around 20 %. Therefore, the Mediterranean forest component progressively decreased to values around 34 %. Some herbs such as Cichorioideae became more abundant reaching average occurrences around 7 %. This pollen zone can be subdivided in subzones 2a and 2b with a boundary at ~2850 cal yr BP (~900 BCE). The principal characteristics that differentiate these subzones is marked by the increase in Mediterranean forest types and the increasing trend in deciduous *Quercus* and Ericaceae. The increase in *Botryococcus* averages ca. 4 to 9 % and the expansion of *Mougeotia* and *Zygnema* type are also noticeable.

##### 4.3.3 Zone Padul-15-05-3 [~1550 to 450 cal yr BP/~400 CE to 1500 CE (41-29 cm)]

This zone is distinguished by the maximum depletion of Mediterranean forest elements. Cichorioideae reached average values of about 40 %. The decrease in Ericaceae is also significant. A decrease in *Botryococcus* and other algal remains is observed in this zone, although there is an increase in other Thecamoebians from average values <1 % to 10 %. This pollen zone is subdivided in subzones 3a and 3b at ~1000 cal yr BP (~950 CE). The main



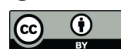

features that differentiate these subzones are the increase in *Olea* from subzone 3a to 3b from average values of ca. 1 to 5 %. The increasing trend in Poaceae is also a feature in this subzone, as well as the slight increase in Asteroideae at the top. Significant changes are documented in NPP percentages in this subzone with the expansion of some fungal remain such as *Tilletia* and *Glomus* type. Furthermore, a decrease in *Botryococcus* and the near disappearance of other algal remains such as *Mougeotia* occurred.

#### 4.3.4 Zone Padul-15-05-4 [~last 450 cal yr BP/ ~ 1500 CE to Present (29-0 cm)]

The main feature in this zone is the significant increase in *Pinus*, reaching maximum values (ca. 32 %), an increase in Poaceae (ca. 40 %) and the decrease in Cichorioideae (from average occurrences of ca. 44 to 16 %). Other important changes are the nearly total disappearance of some shrubs such as *Pistacia* and a decreasing trend in Ericaceae, as well as an important decrease in Mediterranean forest pollen. An increase in wetland pollen taxa, mostly *Typha* also occurred. A significant increase in xerophytes, with the expansion of Amaranthaceae to ~14 %, is also observed in this period. Other herbs such as *Plantago*, Polygonaceae and Convolvulaceae show moderate increases. This zone 4 is subdivided into subzones 4a and 4b (Fig. 4). The top of the record, which corresponds approximately 1830 CE to Present, is characterized by the subzone 4b, the main characteristic that differentiate subzone 4b from the previous 4a is a decrease in some herbs such as Cichorioideae. However, an increase in some xerophytic herbs such as Amaranthaceae occurred. The increase in *Plantago* is also significant during this period. A noteworthy increase in *Pinus* (from an average of ca. 14 to 27 %) and a slight increase in *Olea* and evergreen *Quercus* are also characteristic of this subzone. With respect to NPP, there is an increase in thecamoebians such as *Arcella* type and in the largely coprophilous sordariaceous (Sordariales) group. This zone also documents the decrease in fresh-water algal spores, in *Botryococcus* concomitant with *Mougeotia* and *Zygnema* type.

#### 4.4 Estimated lake level reconstruction

Different local proxies from the Padul-15-05 record [Si, Ca, TOC, MS, Hygrophytes (made up of Cyperaceae and *Typha*), Poaceae and Algae (including *Botryococcus*, *Zygnema* type and *Mougeotia*) groups] have been depicted in order to understand the relationship between lithological, geochemical, and palynological variability and the water lake level oscillations. Sediments with higher values of TOC (more algae and hygrophytes), rich in Ca (related with the occurrence of shells and charophytes remains) most likely characterized a shallow water environment. The absence of aquatic shells, decreasing Ca and a lower TOC and/or a higher input of clastic material (higher MS and Si values) into the lake, could be related with lake level lowering, and a shallower wetland environment (increase in Poaceae) (Fig. 5).

#### 4.5 Spectral analysis

Spectral analysis was performed on selected pollen and NPP time series (Mediterranean forest and *Botryococcus*), as well as TOC in order to identify millennial- and centennial-scale periodicities in the Padul-15-05 record. The mean sampling resolution for pollen and NPP is ca. 50 yr and for geochemical data is ca. 80 yr. Statistically significant cycles, above the 90, 95 and 99 % of confident levels, were found around 800, 680, 300, 240, 200, 170 (Fig. 7).

338 **5 Discussion**

339 Different proxies have been used in this study to interpret the paleoenvironmental and  
340 hydrodynamic changes recorded in the Padul peat bog sedimentary record during the last 4700  
341 cal yr BP. Palynological analysis (pollen and NPP) is commonly used as a proxy for climate  
342 change, lake level variations and human impact and land uses (e.g. Faegri and Iversen, 1990; van  
343 Geel et al., 1983). In this study, we used the variations between Mediterranean forest taxa,  
344 xerophytes and algal communities for paleoclimatic variability and the occurrence of  
345 nitrophilous and ruderal plant communities and some NPPs for identifying human influence in  
346 the study area (Fig. 4). Variations in arboreal pollen (AP, including Mediterranean tree species)  
347 have previously been used in the Sierra Nevada records as a proxy for humidity changes  
348 (Jiménez-Moreno and Anderson, 2012; Ramos-Román et al., 2016). The abundance of the  
349 Mediterranean forest has been used as a proxy for climate change in other studies in the western  
350 Mediterranean region, with higher forest development generally meaning higher humidity  
351 (Fletcher et al., 2013; Fletcher and Sánchez-Gofñi, 2008). On the other hand, increases in  
352 xerophyte pollen taxa (i.e., *Artemisia*, *Ephedra*, *Amaranthaceae*) have been used as an indication  
353 of aridity in this area (Anderson et al., 2011; Carrión et al., 2007).

354 The chlorophyceae alga *Botryococcus* sp. has been described as an indicator of freshwater  
355 environments, in relatively productive fens, temporary pools, ponds or lakes (Guy-Ohlson,  
356 1992). The high visual and statistical correlation between *Botryococcus* from Padul-15-05 and  
357 North Atlantic temperature estimations (Bond et al., 2001;  $r = -0.63$ ;  $p < 0.0001$ ; between ca.  
358 4700 to 1500 cal ka BP – the decreasing and very low *Botryococcus* occurrence in the last 1500  
359 cal yr BP makes this correlation moderate:  $r = -0.48$ ;  $p < 0.0001$  between 4700 and -65 cal yr BP)  
360 seems to show that in this case *Botryococcus* is driven by temperature change and would reflect  
361 variations in lake productivity (increasing with warmer water temperatures).

362 In addition to the palynological analysis, variations in the lithology, geochemistry and  
363 macrofossil remains (gastropod shells and charophytes) from the Padul-15-05 core helped us  
364 reconstruct the estimated lake level and the local environment changes in the Padul peat bog.  
365 Several previous studies on Late Holocene lake records from the Iberian Peninsula show that  
366 lithological changes can be used as a proxy for lake level reconstruction (Martín-Puertas et al.,  
367 2011; Morellón et al., 2009; Riera et al., 2004). For example, carbonate sediments formed by  
368 biogenic remains of gastropods and charophytes are indicative of shallow lake waters (Riera et  
369 al., 2004). Furthermore, van Geel et al. (1983), described occurrences of *Mougeotia* and  
370 *Zygnema* type (Zygnemataceae) as typical of shallow water environments. The increase in  
371 organic matter accumulation deduced by TOC (and Br) could be considered as characteristic of  
372 high productivity (Kalugin et al., 2007) in these shallow water environments. On the other hand,  
373 increases in clastic input in lake sediments have been interpreted as due to lowering of lake level  
374 and more influence of terrestrial-fluvial deposition in a very shallow/ephemeral lake (Martín-  
375 Puertas et al., 2008). We used the variations between those proxies to estimate water level (Fig.  
376 5).

377 Nitrophilous and ruderal pollen taxa (*Convolvulus*, *Plantago lanceolata* type, *Urticaceae* type  
378 and/or *Polygonum avicularis* type) are also very useful as proxies for human impact (Riera et al.,  
379 2004). Some species of Cichorioideae have also been described in different studies from the  
380 Iberian Peninsula as nitrophilous taxa (Abel-Schaad and López-Sáez, 2013). At the same time,  
381 NPP taxa such as some coprophilous fungi, Sordariales and thecamoebians are also used as  
382 indicators of anthropization and land use (Carrión et al., 2007; Ejarque et al., 2015; van Geel et  
383 al., 1989; Riera et al., 2006). *Tilletia* a grass-parasitizing fungi has been described as an indicator



of grass cultivation in other Iberian records (Carrión et al., 2001b). In this study we also used the NPP mycorrhizal fungus *Glomus* sp. as a proxy for erosive activity. This interpretation comes from a study from van Geel et al. (1989), who correlated erosive events with elevated percentages of *Glomus* cf. *fasciculatum*.

## 5.1 Late Holocene aridification trend

This study shows that a progressive aridification trend occurred during at least the last ca. 4700 cal yr BP in the southern Iberian Peninsula. The increase in aridity is shown in the Padul-15-05 core by a progressive decrease in Mediterranean forest component and the increase in herbs (Figs. 4 and 7). Lake level interpretations from our record agree with the pollen and show an overall decrease during the Late Holocene, from a shallow water table containing relatively abundant organic matter (high TOC, indicating higher productivity), gastropods and charophytes (high Ca values) to a low-productive ephemeral/emerged environment (high clastic input and MS and decrease in Ca) (Fig. 5). This progressive aridification confirmed by the increase in siliciclastics pointing to a change towards ephemeral (even emerged) environments became more prominent since the last ca. 1550 cal yr BP and then enhanced again in the last 300 cal yr BP to Present. *Glomus*, a spore from mycorrhizal fungi that occur in soils (van Geel et al., 1989), follows a similar pattern of change, which probably points to enhanced soil erosion in the catchment area during the last 1550 cal yr BP. Furthermore, the increase in some proxies indicating human land use during this last period suggests that humans were more active in this area since then.

These results are supported by previous studies from the Mediterranean area using different proxies documenting an aridification trend since the Middle Holocene (Carrión, 2002; Carrión et al., 2010a; Fletcher et al., 2013; Fletcher and Sánchez-Goñi, 2008; Jiménez-Espejo et al., 2014; Jiménez-Moreno et al., 2015). In the western Mediterranean region this decline in forest development during the Middle and Late Holocene is related with a decrease in summer insolation (Fletcher et al., 2013; Jiménez-Moreno and Anderson, 2012). This would produce a progressive cooling, with a reduction in the length of the growing season as well as a decrease in the sea-surface temperature (Marchal et al., 2002), generating a decrease in the land-sea contrast that would be reflected in a reduction of the wind system and a reduced precipitation gradient from sea to shore during the fall-winter season. Also, a reorganization of the general atmospheric circulation with a northward shift of the westerlies - a long-term enhanced positive NAO trend - has been interpreted, inducing drier conditions in this area since 6000 cal yr BP (Magny et al., 2012). The aridification trend can clearly be seen in the nearby alpine records from the Sierra Nevada, where there was little influence by human activity (Anderson et al., 2011; Jiménez-Moreno et al., 2013; Jiménez-Moreno and Anderson, 2012; Ramos-Román et al., 2016).

## 5.2 Millennial- and centennial-scale climate variability in the Padul peat bog during the Late Holocene

The multi-proxy paleoclimate record from Padul-15-05 shows an overall aridification trend. However, this trend seems to be modulated by millennial- and centennial-scale climatic variability.

### 5.2.1 Aridity pulses around 4200 (4500, 4300 and 4000 cal yr BP) and around 3000 cal yr BP (3300 and 2800 cal yr BP)



Marked aridity pulses are registered in the Padul-15-05 record around 4200 and 3000 cal yr BP (Unit 1; Pollen zones 1 and 2a; Figs. 6 and 7). These arid pulses are mostly evidenced in this record by declines in Mediterranean forest taxa, as well as lake level drops and/or cooling evidenced by a decrease in organic component as TOC and the decrease in *Botryococcus* algae. However, a discrepancy between the local and regional occurs between 3000-2800 cal yr BP, with an increase in the estimated lake level and a decrease in the Mediterranean forest during the late Bronze Age until the early Iron Age (Figs. 6 and 7). The disagreement could be due to deforestation by humans during a very active period of mining in the area observed as a peak in lead pollution in the alpine records from Sierra Nevada (García-Alix et al., 2013). The aridity pulses agree regionally with recent studies carried out at higher elevation in the Sierra Nevada, a decrease in AP percentage in Borreguil de la Caldera record around 4000-3500 cal yr BP (Ramos-Román et al., 2016), high percentage of non-arboreal pollen around 3400 cal ka BP in Zoñar lake [Southern Córdoba Natural Reserve; (Martín-Puertas et al., 2008)], and lake desiccation at ca. 4100 and 2900 cal yr BP in Lake Siles (Carrión et al., 2007). Jalut et al. (2009) compared paleoclimatic records from different lakes in the western Mediterranean region and also suggested a dry phase between 4300 to 3400 cal yr BP, synchronous with this aridification phase. Furthermore, in the eastern Mediterranean basin other pollen studies show a decrease in arboreal pollen concentration toward more open landscapes around 3.7 ka cal BP (Magri, 1999). Significant climatic changes also occurred in the Northern Hemisphere at those times and polar cooling and tropical aridity are observed at ca. 4200-3800 and 3500-2500 cal yr BP; (Mayewski et al., 2004), cold events in the North Atlantic [cold event 3 and 2; (Bond et al., 2001)], decrease in solar irradiance (Steinhilber et al., 2009) and humidity decreases in the eastern Mediterranean area at 4200 cal yr BP (Bar-Matthews et al., 2003) that could be related with global scale climate variability (Fig. 6). These generally dry phases between 4.5 and 2.8 in Padul-15-05 are generally in agreement with persistent positive NAO conditions during this time (Olsen et al., 2012). The high-resolution Padul-15-05 record shows that climatic crises such as the one occurred at ca. 4200 cal yr BP, which seems to be recorded worldwide (Booth et al., 2005), are the product of the sum of more than one single climatic event (i.e., ca. 4500, 4300, 4000 cal yr BP) and thus are affected by climatic variability at centennial-scales.

### 5.2.2 Iberian-Roman Humid Period (~2600 to 1600 cal yr BP)

High relative humidity is recorded in the Padul-15-05 record between ca. 2600 and 1600 cal yr BP, synchronous with the well-known Iberian-Roman Humid Period (IRHP; between 2600 and 1600 cal yr BP; (Martín-Puertas et al., 2009). This is interpreted in our record due to an increase in the Mediterranean forest species at that time (Unit 1; Pollen Zone 2.b; Figs. 6 and 7). In addition, there is a simultaneous increase in *Botryococcus* algae, which is probably related to higher productivity during warmer conditions. Evidence of a wetter climate around this period has also been shown in other regional records and several alpine records from Sierra Nevada. For example, Jiménez-Moreno et al. (2013) studying a sediment record from the Laguna de la Mula, showed an increase in deciduous *Quercus* in correlation with the maximum in algae between 2500 to 1850 cal yr BP, also evidencing the most humid period of the Late Holocene. A geochemical study from the Laguna de Río Seco (also in Sierra Nevada) also evidenced humid conditions around 2200 cal yr BP by the decrease in Saharan dust input and the increase in detritic sedimentation into the lake suggesting higher rainfall (Jiménez-Espejo et al., 2014). In addition, Ramos-Román et al. (2016) showed an increase in AP in the Borreguil de la Caldera record around 2200 cal yr BP, suggesting an increase in humidity at that time.



Other records from the Iberian Peninsula also show this pattern to wetter conditions during the IRHP. For example, high lake levels are recorded in Zoñar Lake in southern Spain between 2460 to 1600 cal yr BP, only interrupted by a relatively arid pulse between 2140 and 1800 cal yr BP (Martín-Puertas et al., 2009). An increase in rainfall is described in the central region of the Iberian Peninsula in a study from the Tablas de Daimiel National Park between 2100 and 1680 cal yr BP (Gil García et al., 2007). Deeper lake levels at around 2650 to 1580 cal yr BP, also interrupted by an short arid event at ca. 2125-1790 cal yr BP, were observed to the north, in the Iberian Range (Currás et al., 2012). The fact that the Padul-15-05 record also shows a relatively arid-cold event between 2150-2050 cal yr BP, just in the middle of this relative humid-warm period, seems to point to a common feature of centennial-scale climatic variability in many western Mediterranean and North Atlantic records (Fig. 6). Humid climate conditions at around 2500 cal yr BP are also interpreted in previous studies from lake level reconstructions from Central Europe (Magny, 2004). Increases in temperate deciduous forest are also observed in marine records from the Alboran Sea around 2600 to 2300 cal yr BP, also pointing to high relative humidity (Combourieu Nebout et al., 2009; Fletcher et al., 2007). Overall humid conditions between 2600 and 1600 cal yr BP seem to agree with predominant negative NAO reconstructions at that time, which would translate into greater winter (and thus more effective) precipitation in the area triggering more development of forest species in the area. Generally warm conditions are interpreted between 1900 and 1700 cal yr BP in the Mediterranean Sea, with high sea surface temperatures (SSTs), and in the North Atlantic area, with the decrease in Drift Ice Index. In addition, persistent positive solar irradiance occurred at that time. The increase in *Botryococcus* algae reaching maxima during the IRHP also seems to point to very productive and perhaps warmer conditions in the Padul peat bog area (Fig. 6).

### 5.2.3 DA and MCA – aridity between ~1550 cal yr BP and 600 cal yr BP

Enhanced aridity occurred right after the IRHP in the Padul peat bog area between ca. 1550 and 600 cal yr BP (ca. 400 - 1350 CE). This is deduced in the Padul-15-05 record by a significant forest decline, with a prominent decrease in Mediterranean forest, an increase in Cichorioideae herbs and the decline in the estimated water level (Unit 1; Pollen Zone 3; Figs. 4 and 7). A significant change since the end of the IRHP took place in the lake environment, suggesting the transition from a shallow water table to an ephemeral environment. This is deduced by the disappearance of charophytes, a significant decrease in Algae component and higher Si and MS and lower TOC values (Unit 1; Figs. 6 and 7).

This arid phase could be separated into two different periods. The first period occurred between ca. 1550 cal yr BP (ca. 400 CE) and ca. 1100 cal yr BP (ca. 900 CE) and is characterized by a decreasing trend in Mediterranean forest and *Botryococcus* taxa and the increase in Cichorioideae. This period corresponds with the Dark Ages [from ca. 500 to 900 CE; (Moreno et al., 2012)]. A visual correlation between the decrease in Mediterranean forest, the increase in the Drift Ice Index in the North Atlantic record (cold event 1; Bond et al., 2001), the decrease in SSTs in the Mediterranean Sea and maxima in positive NAO reconstructions suggests drier and colder conditions during this time (Fig. 6). Other Mediterranean and central-European records agree with our climate interpretations, for example, a decrease in forest extent is shown in a marine record from the Alboran Sea (Fletcher et al., 2013) and a decrease in lake levels is also observed in Central Europe (Magny et al., 2004) pointing to aridity during the DA. Evidences of aridity during the DA have been shown too in the Mediterranean part of the Iberian Peninsula, for instance, cold and arid conditions were suggested in the northern Betic Range by the increase in





xerophytic herbs around 1450 and 750 cal yr BP (Carrión et al., 2001a) and in southeastern Spain by a forest decline in lacustrine deposits around 1620 and 1160 cal yr BP (Carrión et al., 2003). Arid and colder conditions during the Dark Ages (around 1680 to 1000 cal yr BP) are also suggested for the central part of the Iberian Peninsula using a multiproxy study of a sediment record from the Tablas de Daimiel Lake (Gil García et al., 2007). A second period that we could differentiate within this overall arid phase occurred around 1100 to 600 cal yr BP/900 to 1350 CE, during the well-known MCA (900 to 1300 CE after Moreno et al., 2012). During this period the Padul-15-05 record shows a slight increasing trend in the Mediterranean forest taxa with respect to the DA, but the decrease in *Botryococcus* and the higher abundance of herbs still point to overall arid conditions. This change could be related to an increase in temperature, favoring the development of temperate forest species, and would agree with inferred increasing temperatures in the North Atlantic areas, as well as the increase in solar irradiance and the increase in SSTs in the Mediterranean Sea (Fig.7). This hypothesis would agree with the reconstruction of persistent positive NAO and overall warm conditions during the MCA in the western Mediterranean (see synthesis in Moreno et al., 2012). A similar pattern of increasing xerophytic vegetation during the MCA is observed in alpine peat bogs and lakes in the Sierra Nevada (Anderson et al., 2011; Jiménez-Moreno et al., 2013; Ramos-Román et al., 2016) and arid conditions are shown to occur during the MCA in southern and eastern Iberian Peninsula deduced by increases in salinity and lower lake levels (Corella et al., 2013; Martín-Puertas et al., 2011). However, humid conditions have been reconstructed for the northwestern of the Iberian Peninsula at this time (Lebreiro et al., 2006; Moreno et al., 2012), as well as northern Europe (Martín-Puertas et al., 2008). The different pattern of precipitation between the northwestern Iberian Peninsula / northern Europe and the Mediterranean area is undoubtedly a function of the well-known NAO dipole in precipitation pattern (Trouet et al., 2009).

#### 5.2.4 The last ~600 cal yr BP: LIA (1350-1850 CE) and IE (1850 CE-Present)

Two climatically different periods can be distinguished during the last ca. 600 cal yr BP (end of Zone 3b to Zone 4; Fig. 4) in the area. However, the climatic signal is more difficult to interpret due to a higher human impact at that time. The first phase around 1350-1450 CE was characterized by increasing relative humidity by the decrease in xerophytes and the increase in Mediterranean forest taxa and *Botryococcus* after a period of decrease during the DA and MCA, corresponding to the LIA. The second phase is characterized here by the decrease in the Mediterranean forest around 1700-1850 CE, pointing to a return to more arid conditions during the last part of the LIA (Figs. 4 and 7). This climatic pattern agrees with an increase in precipitation by the transition from positive to negative NAO mode and from warmer to cooler conditions in the North Atlantic area during the first phase of the LIA and a second phase characterized by cooler (cold event 0; Bond et al., 2001) and drier conditions (Fig. 6). A stronger variability in the SSTs is described in the Mediterranean Sea during the LIA (Fig. 6). Mayewski et al. (2004) described a period of climate variability during the Holocene at this time (600 to 150 cal yr BP) suggesting a polar cooling but more humid in some parts of the tropics. Regionally, (Morellón et al., 2011) also described a phase of more humid conditions between 1530 to 1750 CE in a lake sediment record from NE Spain. An alternation between wetter to drier periods during the LIA are also shown in the nearby alpine record from Borreguil de la Caldera in the Sierra Nevada mountain range (Ramos-Román et al., 2016).



560 The environmental transition from ephemeral to emerged conditions, observed in the last ca.  
561 1550 cal yr BP (Unit 1; Fig. 5), intensified in the last ca. 300 cal yr BP. This is shown by the  
562 highest MS and Si values the increase in wetland plants and the stronger decrease in Ca and  
563 organic components (TOC) in the sediments in the uppermost part of the Padul-15-05 record  
564 (Unit 2; Figs. 3 and 6).

### 565 5.3 Centennial-scale variability

566 Time series analysis has become important in determining the recurrent periodicity of cyclical  
567 oscillations in paleoenvironmental sequences (e.g. Jiménez-Espejo et al., 2014; Ramos-Román et  
568 al., 2016; Rodrigo-Gámiz et al., 2014; Fletcher et al., 2013). This analysis also assists in  
569 understanding possible relationships between the paleoenvironmental proxy data and the  
570 potential triggers of the observed cyclical changes: i.e., solar activity, atmospheric, oceanic  
571 dynamics and climate evolution during the Holocene. The cyclostratigraphic analysis on the  
572 pollen (Mediterranean forest; regional signal), algae (*Botryococcus*; local signal) and TOC (local  
573 signal) times series from the Padul-15-05 record evidence centennial-scale cyclical patterns with  
574 periodicities around 800, 680, 300, 240, 200 and 170 years above the 90 % confidence levels  
575 (Fig. 7).

576 Previous cyclostratigraphic analysis in Holocene western Mediterranean records suggest cyclical  
577 climatic oscillations with periodicities around 1500 and 1750 yr (Fletcher et al., 2013; Jiménez-  
578 Espejo et al., 2014; Rodrigo-Gámiz et al., 2014). Other North Atlantic and Mediterranean  
579 records also present cyclicities in their paleoclimatic proxies of ca. 1600 yr (Bond et al., 2001;  
580 Debret et al., 2007; Rodrigo-Gámiz et al., 2014). However, this cycle is absent from the  
581 cyclostratigraphic analysis in the Padul-15-05 record (Fig. 7). In contrast, the spectral analysis  
582 performed in the Mediterranean forest time series from Padul peat bog record, pointing to  
583 cyclical hydrological changes, shows a significant ~800 yr cycle that could be related to solar  
584 variability (Damon and Sonett, 1991) or could be the second harmonic of the ca. ~1600 yr  
585 oceanic-related cycle (Debret et al., 2009). A very similar periodicity of ca. 760 yr is detected in  
586 the *Pinus* forest taxa, also pointing to humidity variability, from the alpine Sierra Nevada site of  
587 Borreguil de la Caldera and seems to show that this is a common feature of cyclical  
588 paleoclimatic oscillation in the area.

589 A significant ~680 cycle is shown in the *Botryococcus* time series most likely suggesting  
590 recurrent centennial-scale changes in temperature (productivity) and water availability. A similar  
591 cycle is shown in the *Artemisia* signal in an alpine record from Sierra Nevada (Ramos-Román et  
592 al., 2016). This cycle around ~650 yr is also observed in a marine record from the Alboran Sea,  
593 and was interpreted as the secondary harmonic of the 1300 yr cycle that those authors related  
594 with cyclic thermohaline circulation and sea surface temperature changes (Rodrigo-Gámiz et al.,  
595 2014).

596 A statistically significant ~300 yr cycle is shown in the Mediterranean forest taxa and TOC from  
597 the Padul-15-05 record suggesting shorter-scale variability in water availability. This cycle is  
598 also observed in the cyclical *Pinus* pollen data from Borreguil de la Caldera at higher elevations  
599 in the Sierra Nevada (Ramos-Román et al., 2016). This cycle could be principally related to  
600 NAO variability as observed by Olsen et al. (2012), which follows variations in humidity  
601 observed in the Padul-15-05 record. NAO variability also regulates modern precipitation in the  
602 area.

603 The *Botryococcus* and TOC time series shows variability with a periodicity around ~240, 200  
604 and 164 yrs. Sonnet et al. (1984) described a significant cycle in solar activity around ~208 yr



(Suess solar cycle), which could have triggered our ~200 cyclicity. The observed ~240 yr periodicity in the Padul-15-05 record could be either related to variations in solar activity or due to the mixed effect of the solar together with the ~300 yr NAO-interpreted cycle and could point to a solar origin of the centennial-scale NAO variations as suggested by previously published research (Lukianova and Alekseev, 2004; Zanchettin et al., 2008). Finally, a significant ~170 yr cycle has been observed in both the Mediterranean forest taxa and *Botryococcus* times series from the Padul-15-05 record. A similar cycle (between 168-174 yr) was also described in the alpine pollen record from Borreguil de la Caldera in Sierra Nevada (Ramos-Román et al., 2016), which shows that it is a significant cyclical pattern in climate, probably precipitation, in the area. This cycle could be related to the previously described ~170 yr cycle in the NAO index (Olsen et al., 2012), which would agree with the hypothesis of the NAO controlling millennial- and centennial-scale environmental variability during the Late Holocene in the area (García-Alix et al., 2017; Ramos-Román et al., 2016).

#### 5.4 Human activity

Humans probably had an impact in the area since Prehistoric times, however, the Padul-15-05 multiproxy record shows a more significant human impact during the last ca. 1550 cal yr BP, which intensified in the last ca. 500 cal yr BP (since 1450 CE to Present). This is deduced by a significant increase in nitrophilous plant taxa such as *Cichorioideae*, Convolvulaceae, Polygonaceae and *Plantago* and the increase in some NPP such as *Tilletia*, coprophilous fungi and thecamoebians (Unit 2; Pollen Zone 4; Fig. 4). Most of these pollen taxa and NPPs are described in other southern Iberian paleoenvironmental records as indicators of land uses, for instance, *Tilletia* and covarying *Cichorioideae* and Convolvulaceae have been described as indicators of farming (e.g. Carrión et al., 2001b). Interestingly, these taxa being to decline around ~1450 CE, coinciding with the higher increase in detritic material into the basin. Climatically, this event coincides with the start of persistent negative NAO conditions in the area (Trouet et al., 2009), which could have further triggered more rainfall and more detritic input into the basin. Bellin et al., 2011 in a study from the Betic Cordillera (southern Iberian Peninsula) demonstrate that soil erosion increase in years with higher rainfall and this could be intensified by human impact. Nevertheless, in a study in the southeastern part of the Iberian Peninsula (Bellin et al., 2013) suggested that major soil erosion could have occurred by the abandonment of agricultural activities in the mountain areas as well as the abandonment of irrigated terrace systems during the Christian Reconquest. Enhanced soil erosion at this time is also supported by the increase in *Glomus* type (Fig. 4).

An important change in the sedimentation in the environment is observed during the last ca. 300 cal yr BP marked by the stronger increase in MS and Si values. This was probably related with the Padul peat bog water drainage by humans using canals in the late XVIII century for cultivation purposes (Villegas Molina, 1967). The increase in wetland vegetation and higher values of Poaceae could be due to cultivation of cereals or by an increase in the population of *Phragmites australis* (also a Poaceae), very abundant in the Padul peat bog margins at present due to the increase in drained land surface.

The uppermost part (last ca. 100 cal yr BP) of the pollen record from Padul-15-05 shows an increasing trend in some arboreal taxa at that time, including Mediterranean forest, *Olea* and *Pinus* (Fig. 4). This change is most likely of human origin and generated by the increase in *Olea* cultivation in the last two centuries, also observed in many records from higher elevation sites from Sierra Nevada, and *Pinus* and other Mediterranean species reforestation in the 20<sup>th</sup> century



(Anderson et al., 2011; Jiménez-Moreno and Anderson, 2012; Jiménez-Moreno et al., 2013; Ramos-Román et al., 2016).

## 6 Conclusions

Our multiproxy (i.e. lithology, geochemistry, paleontology) analysis from the Padul-15-05 sequence has provided a detailed climate reconstruction for the last 4700 ca yr BP for the Padul peat bog area and the western Mediterranean. This study, supported by the comparison with other Mediterranean and North Atlantic records suggests a link between vegetation, atmospheric dynamics and insolation and solar activity during the Late Holocene in this area. A climatic aridification trend occurred during the Late Holocene in the Sierra Nevada and the western Mediterranean area, probably linked with the orbital-scale decreasing trend in summer insolation. This long-term trend is modulated by centennial-scale climate variability as shown by the pollen (Mediterranean forest taxa) algae (*Botryococcus*) and sedimentary and geochemical data in the Padul record. These events are in correlation with regional and global scale climate variability and cold and arid pulses around the 4200 and 3000 cal yr BP that are identified in this study seem to be synchronous with cold events recorded in the North Atlantic and decreases in precipitation in the Mediterranean area, probably linked to persistent positive NAO mode. Moreover, one of the most important humid and warmer periods during the Late Holocene in the Padul area coincides in time with the well-known IRHP, warm and humid conditions in the Mediterranean and North Atlantic regions and overall negative NAO conditions. A drastic decrease in Mediterranean forest taxa towards an open landscape, pointing to colder and enhanced aridity, occurred in two steps (DA and end of the LIA) during the last ca. 1550 cal yr BP. However, this trend was slightly superimposed by a more arid but warmer event coinciding with the MCA and a cold but wetter event during the first part of the LIA. Besides natural climatic and environmental variability, there seems to be intense human activities in the area during the last the last ca. 1550 cal yr BP. This suggests that the natural aridification trend during the Late Holocene in the western Mediterranean region could have been intensified due to the higher human activity in this area. Furthermore, time series analyses done in the Padul-15-05 record show centennial-scale changes in the environment and climate that are coincident with the periodicities observed in solar, oceanic and NAO reconstructions and could show a close cause-and-effect linkage between them.

## Acknowledgement

This work was supported by the project P11-RNM-7332 funded by Consejería de Economía, Innovación, Ciencia y Empleo de la Junta de Andalucía, the project CGL2013-47038-R funded by Ministerio de Economía y Competitividad of Spain and fondo Europeo de desarrollo regional FEDER and the research group RNM0190 (Junta de Andalucía). M. J. R.-R. acknowledges the PhD funding provided by Consejería de Economía, Innovación, Ciencia y Empleo de la Junta de Andalucía (P11-RNM-7332). J.C. acknowledges the PhD funding provided by Ministerio de Economía y Competitividad (CGL2013-47038-R). A.G.-A. was also supported by a Ramón y Cajal Fellowship RYC-2015-18966 of the Spanish Government (Ministerio de Economía y Competitividad). Javier Jaimez (CIC-UGR) is thanked for graciously helping with the coring, the drilling equipment and logistics.

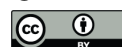

## 692 References

- 693 Abel-Schaad, D. and López-Sáez, J. A.: Vegetation changes in relation to fire history and human  
694 activities at the Peña Negra mire (Bejar Range, Iberian Central Mountain System, Spain) during  
695 the past 4,000 years, *Veg. Hist. Archaeobotany*, 22(3), 199–214, doi:10.1007/s00334-012-0368-  
696 9, 2013.
- 697 Al Aallali, A., Nieto, J. M. L., Raya, F. A. P. and Mesa, J. M.: Estudio de la vegetación forestal en la  
698 vertiente sur de Sierra Nevada (Alpujarra Alta granadina), *Itinera Geobot.*, (11), 387–402, 1998.
- 699 Alfaro, P., Galinod-Zaldievar, J., Jabaloy, A., López-Garrido, A. C. and Sanz de Galdeano, C.:  
700 Evidence for the activity and paleoseismicity of the Padul fault (Betic Cordillera, Southern Spain)  
701 [Evidencias de actividad y paleosismicidad de la falla de Padul (Cordillera Bética, sur de  
702 España)], *Acta Geol. Hisp.*, 36(3–4), 283–297, 2001.
- 703 Alpert, P., Baldi, M., Ilani, R., Krichak, S., Price, C., Rodó, X., Saaroni, H., Ziv, B., Kishcha, P.,  
704 Barkan, J., Mariotti, A. and Xoplaki, E.: Chapter 2 Relations between climate variability in the  
705 Mediterranean region and the tropics: ENSO, South Asian and African monsoons, hurricanes  
706 and Saharan dust, *Dev. Earth Environ. Sci.*, 4(C), 149–177, doi:10.1016/S1571-9197(06)80005-4,  
707 2006.
- 708 Anderson, R. S., Jiménez-Moreno, G., Carrión, J. S. and Pérez-Martínez, C.: Postglacial history of  
709 alpine vegetation, fire, and climate from Laguna de Río Seco, Sierra Nevada, southern Spain,  
710 *Quat. Sci. Rev.*, 30(13–14), 1615–1629, doi:<https://doi.org/10.1016/j.quascirev.2011.03.005>,  
711 2011.
- 712 Bar-Matthews, M., Ayalon, A., Gilmour, M., Matthews, A. and Hawkesworth, C. J.: Sea–land  
713 oxygen isotopic relationships from planktonic foraminifera and speleothems in the Eastern  
714 Mediterranean region and their implication for paleorainfall during interglacial intervals,  
715 *Geochim. Cosmochim. Acta*, 67(17), 3181–3199, doi:[https://doi.org/10.1016/S0016-](https://doi.org/10.1016/S0016-7037(02)01031-1)  
716 7037(02)01031-1, 2003.
- 717 Bellin, N., Vanacker, V., van Wesemael, B., Solé-Benet, A. and Bakker, M. M.: Natural and  
718 anthropogenic controls on soil erosion in the internal betic Cordillera (southeast Spain), *Catena*,  
719 87(2), 190–200, doi:10.1016/j.catena.2011.05.022, 2011.
- 720 Bellin, N., Vanacker, V. and De Baets, S.: Anthropogenic and climatic impact on Holocene  
721 sediment dynamics in SE Spain: A review, *Quat. Int.*, 308–309, 112–129,  
722 doi:10.1016/j.quaint.2013.03.015, 2013.
- 723 Beug, H.-J.: Leitfaden der Pollenbestimmung für Mitteleuropa und angrenzende Gebiete, *Fisch.*  
724 *Stuttg.*, 61, 1961.
- 725 Blaauw, M.: Methods and code for “classical” age-modelling of radiocarbon sequences, *Quat.*  
726 *Geochronol.*, 5(5), 512–518, doi:<https://doi.org/10.1016/j.quageo.2010.01.002>, 2010.





- 727 Bond, G., Kromer, B., Beer, J., Muscheler, R., Evans, M. N., Showers, W., Hoffmann, S., Lotti-  
728 Bond, R., Hajdas, I. and Bonani, G.: Persistent Solar Influence on North Atlantic Climate During  
729 the Holocene, *Science*, 294(5549), 2130, doi:10.1126/science.1065680, 2001.
- 730 Booth, R. K., Jackson, S. T., Forman, S. L., Kutzbach, J. E., E. A. Bettis, I., Kreigs, J. and Wright, D.  
731 K.: A severe centennial-scale drought in midcontinental North America 4200 years ago and  
732 apparent global linkages, *The Holocene*, 15(3), 321–328, doi:10.1191/0959683605hl825ft,  
733 2005.
- 734 Carrión, J. S.: Patterns and processes of Late Quaternary environmental change in a montane  
735 region of southwestern Europe, *Quat. Sci. Rev.*, 21(18–19), 2047–2066,  
736 doi:[https://doi.org/10.1016/S0277-3791\(02\)00010-0](https://doi.org/10.1016/S0277-3791(02)00010-0), 2002.
- 737 Carrión, J. S., Munuera, M., Dupré, M. and Andrade, A.: Abrupt vegetation changes in the  
738 Segura Mountains of southern Spain throughout the Holocene, *J. Ecol.*, 89(5), 783–797,  
739 doi:10.1046/j.0022-0477.2001.00601.x, 2001a.
- 740 Carrión, J. S., Andrade, A., Bennett, K. D., Navarro, C. and Munuera, M.: Crossing forest  
741 thresholds: inertia and collapse in a Holocene sequence from south-central Spain, *The*  
742 *Holocene*, 11(6), 635–653, doi:10.1191/09596830195672, 2001b.
- 743 Carrión, J. S., Fernández, S., Jiménez-Moreno, G., Fauquette, S., Gil-Romera, G., González-  
744 Sampériz, P. and Finlayson, C.: The historical origins of aridity and vegetation degradation in  
745 southeastern Spain, *J. Arid Environ.*, 74(7), 731–736,  
746 doi:<https://doi.org/10.1016/j.jaridenv.2008.11.014>, 2010b.
- 747 Carrión, J. S., Sánchez-Gómez, P., Mota, J. F., Yll, R. and Chaín, C.: Holocene vegetation  
748 dynamics, fire and grazing in the Sierra de Gádor, southern Spain, *Holocene*, 13(6), 839–849,  
749 doi:10.1191/0959683603hl662rp, 2003.
- 750 Carrión, J. S., Fuentes, N., González-Sampériz, P., Quirante, L. S., Finlayson, J. C., Fernández, S.  
751 and Andrade, A.: Holocene environmental change in a montane region of southern Europe with  
752 a long history of human settlement, *Quat. Sci. Rev.*, 26(11–12), 1455–1475,  
753 doi:<https://doi.org/10.1016/j.quascirev.2007.03.013>, 2007.
- 754 Carrión, J. S., Fernández, S., González-Sampériz, P., Gil-Romera, G., Badal, E., Carrión-Marco, Y.,  
755 López-Merino, L., López-Sáez, J. A., Fierro, E. and Burjachs, F.: Expected trends and surprises in  
756 the Lateglacial and Holocene vegetation history of the Iberian Peninsula and Balearic Islands,  
757 *Rev. Palaeobot. Palynol.*, 162(3), 458–475,  
758 doi:<http://dx.doi.org/10.1016/j.revpalbo.2009.12.007>, 2010.
- 759 Combourieu-Nebout, N., Peyron, O., Dormoy, I., Desprat, S., Beaudouin, C., Kotthoff, U. and  
760 Marret, F.: Rapid climatic variability in the west Mediterranean during the last 25 000 years  
761 from high resolution pollen data, *Clim Past*, 5(3), 503–521, doi:10.5194/cp-5-503-2009, 2009.
- 762 Corella, J. P., Stefanova, V., El Anjoumi, A., Rico, E., Giralt, S., Moreno, A., Plata-Montero, A. and



- 763 Valero-Garcés, B. L.: A 2500-year multi-proxy reconstruction of climate change and human  
764 activities in northern Spain: The Lake Arreo record, *Palaeogeogr. Palaeoclimatol. Palaeoecol.*,  
765 386, 555–568, doi:10.1016/j.palaeo.2013.06.022, 2013.
- 766 Currás, A., Zamora, L., Reed, J. M., García-Soto, E., Ferrero, S., Armengol, X., Mezquita-Joanes,  
767 F., Marqués, M. A., Riera, S. and Julià, R.: Climate change and human impact in central Spain  
768 during Roman times: High-resolution multi-proxy analysis of a tufa lake record (Somolinos,  
769 1280m asl), *Catena*, 89(1), 31–53, doi:10.1016/j.catena.2011.09.009, 2012.
- 770 Damon, P. E. and Sonett, C. P.: Solar and terrestrial components of the atmospheric C-14  
771 variation spectrum. In: Sonett, C.P., Giampapa, M.S., Matthews, M.S. (Eds.), *The Sun in Time*.  
772 University of Arizona Press, Tucson, AZ, USA., 1991.
- 773 Debret, M., Bout-Roumzeilles, V., Grousset, F., Desmet, M., McManus, J. F., Massei, N., Sebag,  
774 D., Petit, J.-R., Copard, Y. and Trentesaux, A.: The origin of the 1500-year climate cycles in  
775 holocene north-atlantic records, *Clim. Past*, 3(4), 569–575, 2007.
- 776 Debret, M., Sebag, D., Crosta, X., Massei, N., Petit, J.-R., Chapron, E. and Bout-Roumzeilles, V.:  
777 Evidence from wavelet analysis for a mid-Holocene transition in global climate forcing, *Quat.*  
778 *Sci. Rev.*, 28(25–26), 2675–2688, doi:<https://doi.org/10.1016/j.quascirev.2009.06.005>, 2009.
- 779 Delgado, J., Alfaro, P., Galindo-Zaldivar, J., Jabaloy, A., Lopez Garrido, A. and Sanz de Galdeano,  
780 C.: Structure of the Padul-Nigüelas basin (S Spain) from H/V ratios of ambient noise: application  
781 of the method to study peat and coarse sediments, *Pure Appl. Geophys.*, 159(11), 2733–2749,  
782 2002.
- 783 Domingo-García, M., Fernández-Rubio, R., Lopez, J. and González, C.: Aportación al  
784 conocimiento de la Neotectónica de la Depresión del Padul (Granada), *Tecniterrae*, 53, 6–16,  
785 1983.
- 786 Ejarque, A., Anderson, R. S., Simms, A. R. and Gentry, B. J.: Prehistoric fires and the shaping of  
787 colonial transported landscapes in southern California: A paleoenvironmental study at Dune  
788 Pond, Santa Barbara County, *Quat. Sci. Rev.*, 112, 181–196,  
789 doi:<https://doi.org/10.1016/j.quascirev.2015.01.017>, 2015.
- 790 Faegri, K. and Iversen, J.: *Textbook of Pollen Analysis*. Wiley, New York., 1989.
- 791 Fletcher, W. J. and Sánchez-Goñi, M. F.: Orbital- and sub-orbital-scale climate impacts on  
792 vegetation of the western Mediterranean basin over the last 48,000 yr, *Quat. Res.*, 70(3), 451–  
793 464, doi:10.1016/j.yqres.2008.07.002, 2008.
- 794 Fletcher, W. J., Debret, M. and Sánchez-Goñi, M. F.: Mid-Holocene emergence of a low-  
795 frequency millennial oscillation in western Mediterranean climate: Implications for past  
796 dynamics of the North Atlantic atmospheric westerlies, *The Holocene*, 23(2), 153–166,  
797 doi:10.1177/0959683612460783, 2013.



- 798 Florschütz, F., Amor, J. M. and Wijmstra, T. A.: Palynology of a thick quaternary succession in  
799 southern Spain, *Palaeogeogr. Palaeoclimatol. Palaeoecol.*, 10(4), 233–264,  
800 doi:[http://dx.doi.org/10.1016/0031-0182\(71\)90049-6](http://dx.doi.org/10.1016/0031-0182(71)90049-6), 1971.
- 801 García-Alix, A., Jimenez-Espejo, F. J., Lozano, J. A., Jiménez-Moreno, G., Martinez-Ruiz, F.,  
802 Sanjuán, L. G., Jiménez, G. A., Alfonso, E. G., Ruiz-Puertas, G. and Anderson, R. S.:  
803 Anthropogenic impact and lead pollution throughout the Holocene in Southern Iberia, *Sci. Total*  
804 *Environ.*, 449, 451–460, doi:<https://doi.org/10.1016/j.scitotenv.2013.01.081>, 2013.
- 805 García-Alix, A., Jiménez-Espejo, F. J., Toney, J. L., Jiménez-Moreno, G., Ramos-Román, M. J.,  
806 Anderson, R. S., Ruano, P., Queralt, I., Delgado Huertas, A. and Kuroda, J.: Alpine bogs of  
807 southern Spain show human-induced environmental change superimposed on long-term  
808 natural variations, *Sci. Rep.*, 7(1), 7439, doi:[10.1038/s41598-017-07854-w](https://doi.org/10.1038/s41598-017-07854-w), 2017.
- 809 van Geel, B., Hallewas, D. P. and Pals, J. P.: A late holocene deposit under the Westfrieze Zeedijk  
810 near Enkhuizen (Prov. of Noord-Holland, The Netherlands): Palaeoecological and archaeological  
811 aspects, *Rev. Palaeobot. Palynol.*, 38(3), 269–335, doi:[http://dx.doi.org/10.1016/0034-](http://dx.doi.org/10.1016/0034-6667(83)90026-X)  
812 [6667\(83\)90026-X](http://dx.doi.org/10.1016/0034-6667(83)90026-X), 1983.
- 813 van Geel, B., Coope, G. R. and Hammen, T. V. D.: Palaeoecology and stratigraphy of the  
814 lateglacial type section at Usselo (the Netherlands), *Rev. Palaeobot. Palynol.*, 60(1), 25–129,  
815 doi:[http://dx.doi.org/10.1016/0034-6667\(89\)90072-9](http://dx.doi.org/10.1016/0034-6667(89)90072-9), 1989.
- 816 Gil García, M. J., Ruiz Zapata, M. B., Santisteban, J. I., Mediavilla, R., López-Pamo, E. and Dabrio,  
817 C. J.: Late holocene environments in Las Tablas de Daimiel (south central Iberian peninsula,  
818 Spain), *Veg. Hist. Archaeobotany*, 16(4), 241–250, doi:[10.1007/s00334-006-0047-9](https://doi.org/10.1007/s00334-006-0047-9), 2007.
- 819 Gil-Romera, G., González-Sampériz, P., Lasheras-Álvarez, L., Sevilla-Callejo, M., Moreno, A.,  
820 Valero-Garcés, B., López-Merino, L., Carrión, J. S., Pérez Sanz, A., Aranbarri, J. and García-Prieto  
821 Fonce, E.: Biomass-modulated fire dynamics during the Last Glacial–Interglacial Transition at  
822 the Central Pyrenees (Spain), *Palaeogeogr. Palaeoclimatol. Palaeoecol.*, 402, 113–124,  
823 doi:<https://doi.org/10.1016/j.palaeo.2014.03.015>, 2014.
- 824 Grimm, E. C.: CONISS: a FORTRAN 77 program for stratigraphically constrained cluster analysis  
825 by the method of incremental sum of squares, *Comput. Geosci.*, 13(1), 13–35,  
826 doi:[http://dx.doi.org/10.1016/0098-3004\(87\)90022-7](http://dx.doi.org/10.1016/0098-3004(87)90022-7), 1987.
- 827 Guy-Ohlson, D.: Botryococcus as an aid in the interpretation of palaeoenvironment and  
828 depositional processes, *Rev. Palaeobot. Palynol.*, 71(1), 1–15,  
829 doi:[http://dx.doi.org/10.1016/0034-6667\(92\)90155-A](http://dx.doi.org/10.1016/0034-6667(92)90155-A), 1992.
- 830 Hurrell, J. W.: Decadal Trends in the North Atlantic Oscillation: Regional Temperatures and  
831 Precipitation, *Science*, 269(5224), 676, doi:[10.1126/science.269.5224.676](https://doi.org/10.1126/science.269.5224.676), 1995.
- 832 Jalut, G., Dedoubat, J. J., Fontugne, M. and Otto, T.: Holocene circum-Mediterranean vegetation  
833 changes: Climate forcing and human impact, *Quat. Int.*, 200(1–2), 4–18,



- 834 doi:<https://doi.org/10.1016/j.quaint.2008.03.012>, 2009.
- 835 Jiménez-Espejo, F. J., García-Alix, A., Jiménez-Moreno, G., Rodrigo-Gámiz, M., Anderson, R. S.,  
 836 Rodríguez-Tovar, F. J., Martínez-Ruiz, F., Giralt, S., Delgado Huertas, A. and Pardo-Igúzquiza, E.:  
 837 Saharan aeolian input and effective humidity variations over western Europe during the  
 838 Holocene from a high altitude record, *Chem. Geol.*, 374–375, 1–12,  
 839 doi:[10.1016/j.chemgeo.2014.03.001](https://doi.org/10.1016/j.chemgeo.2014.03.001), 2014.
- 840 Jiménez-Moreno, G. and Anderson, R. S.: Holocene vegetation and climate change recorded in  
 841 alpine bog sediments from the Borreguiles de la Virgen, Sierra Nevada, southern Spain, *Quat.*  
 842 *Res.*, 77(1), 44–53, doi:[10.1016/j.yqres.2011.09.006](https://doi.org/10.1016/j.yqres.2011.09.006), 2012.
- 843 Jiménez-Moreno, G., García-Alix, A., Hernández-Corbalán, M. D., Anderson, R. S. and Delgado-  
 844 Huertas, A.: Vegetation, fire, climate and human disturbance history in the southwestern  
 845 Mediterranean area during the late Holocene, *Quat. Res.*, 79(2), 110–122,  
 846 doi:<https://doi.org/10.1016/j.yqres.2012.11.008>, 2013.
- 847 Jiménez-Moreno, G., Rodríguez-Ramírez, A., Pérez-Asensio, J. N., Carrión, J. S., López-Sáez, J. A.,  
 848 Villarias-Robles, J. J. R., Celestino-Pérez, S., Cerrillo-Cuenca, E., León, Á. and Contreras, C.:  
 849 Impact of late-Holocene aridification trend, climate variability and geodynamic control on the  
 850 environment from a coastal area in SW Spain, *Holocene*, 25(4), 607–617,  
 851 doi:[10.1177/0959683614565955](https://doi.org/10.1177/0959683614565955), 2015.
- 852 Kalugin, I., Daryin, A., Smolyaninova, L., Andreev, A., Diekmann, B. and Khlystov, O.: 800-yr-long  
 853 records of annual air temperature and precipitation over southern Siberia inferred from  
 854 Teletskoye Lake sediments, *Quat. Res.*, 67(3), 400–410,  
 855 doi:<https://doi.org/10.1016/j.yqres.2007.01.007>, 2007.
- 856 Laskar, J., Robutel, P., Joutel, F., Gastineau, M., Correia, A. C. M. and Levrard, B.: A long-term  
 857 numerical solution for the insolation quantities of the Earth, *A&A*, 428(1), 261–285,  
 858 doi:[10.1051/0004-6361:20041335](https://doi.org/10.1051/0004-6361:20041335), 2004.
- 859 Lebreiro, S. M., Francés, G., Abrantes, F. F. G., Diz, P., Bartels-Jónsdóttir, H. B., Stoyanowski, Z.  
 860 N., Gil, I. M., Pena, L. D., Rodrigues, T., Jones, P. D., Nombela, M. A., Alejo, I., Briffa, K. R., Harris,  
 861 I. and Grimalt, J. O.: Climate change and coastal hydrographic response along the Atlantic  
 862 Iberian margin (Tagus Prodelt and Muros Ría) during the last two millennia, *Holocene*, 16(7),  
 863 1003–1015, doi:[10.1177/0959683606h1990rp](https://doi.org/10.1177/0959683606h1990rp), 2006.
- 864 Lillios, K. T., Blanco-González, A., Drake, B. L. and López-Sáez, J. A.: Mid-late Holocene climate,  
 865 demography, and cultural dynamics in Iberia: A multi-proxy approach, *Quat. Sci. Rev.*, 135, 138–  
 866 153, doi:<https://doi.org/10.1016/j.quascirev.2016.01.011>, 2016.
- 867 López-Sáez, J. A., Abel-Schaad, D., Pérez-Díaz, S., Blanco-González, A., Alba-Sánchez, F., Dorado,  
 868 M., Ruiz-Zapata, B., Gil-García, M. J., Gómez-González, C. and Franco-Múgica, F.: Vegetation  
 869 history, climate and human impact in the Spanish Central System over the last 9000 years,



- 870 Quat. Int., 353, 98–122, doi:<https://doi.org/10.1016/j.quaint.2013.06.034>, 2014.
- 871 Lukianova, R. and Alekseev, G.: Long-Term Correlation Between the Nao and Solar Activity, Sol.  
872 Phys., 224(1), 445–454, doi:[10.1007/s11207-005-4974-x](https://doi.org/10.1007/s11207-005-4974-x), 2004.
- 873 Magny, M.: Holocene climate variability as reflected by mid-European lake-level fluctuations  
874 and its probable impact on prehistoric human settlements, Quat. Int., 113(1), 65–79,  
875 doi:[https://doi.org/10.1016/S1040-6182\(03\)00080-6](https://doi.org/10.1016/S1040-6182(03)00080-6), 2004.
- 876 Magny, M., Peyron, O., Sadori, L., Ortu, E., Zanchetta, G., Vanni re, B. and Tinner, W.:  
877 Contrasting patterns of precipitation seasonality during the Holocene in the south- and north-  
878 central Mediterranean, J. Quat. Sci., 27(3), 290–296, doi:[10.1002/jqs.1543](https://doi.org/10.1002/jqs.1543), 2012.
- 879 Magri, D.: Late Quaternary vegetation history at Lagaccione near Lago di Bolsena (central Italy),  
880 Rev. Palaeobot. Palynol., 106(3–4), 171–208, doi:[https://doi.org/10.1016/S0034-6667\(99\)00006-8](https://doi.org/10.1016/S0034-6667(99)00006-8), 1999.
- 882 Marchal, O., Cacho, I., Stocker, T. F., Grimalt, J. O., Calvo, E., Martrat, B., Shackleton, N.,  
883 Vautravers, M., Cortijo, E., Van Kreveld, S., Andersson, C., Ko , N., Chapman, M., Sba fi, L.,  
884 Duplessy, J.-C., Sarnthein, M., Turon, J.-L., Duprat, J. and Jansen, E.: Apparent long-term cooling  
885 of the sea surface in the northeast Atlantic and Mediterranean during the Holocene, Quat. Sci.  
886 Rev., 21(4–6), 455–483, doi:[10.1016/S0277-3791\(01\)00105-6](https://doi.org/10.1016/S0277-3791(01)00105-6), 2002.
- 887 Mart n-Puertas, C., Valero-Garc s, B. L., Mata, M. P., Gonz lez-Samp riz, P., Bao, R., Moreno, A.  
888 and Stefanova, V.: Arid and humid phases in southern Spain during the last 4000 years: the  
889 Zo nar Lake record, C rdoba, The Holocene, 18(6), 907–921, doi:[10.1177/0959683608093533](https://doi.org/10.1177/0959683608093533),  
890 2008.
- 891 Mart n-Puertas, C., Valero-Garc s, B. L., Brauer, A., Mata, M. P., Delgado-Huertas, A. and Dulski,  
892 P.: The Iberian-Roman Humid Period (2600–1600 cal yr BP) in the Zo nar Lake varve record  
893 (Andaluc a, southern Spain), Quat. Res., 71(2), 108–120, doi:[10.1016/j.yqres.2008.10.004](https://doi.org/10.1016/j.yqres.2008.10.004), 2009.
- 894 Mart n-Puertas, C., Valero-Garc s, B. L., Mata, M. P., Moreno, A., Giral t, S., Mart nez-Ruiz, F.  
895 and Jim nez-Espejo, F.: Geochemical processes in a Mediterranean Lake: A high-resolution  
896 study of the last 4,000 years in Zo nar Lake, southern Spain, J. Paleolimnol., 46(3), 405–421,  
897 doi:[10.1007/s10933-009-9373-0](https://doi.org/10.1007/s10933-009-9373-0), 2011.
- 898 Mayewski, P. A., Rohling, E. E., Stager, J. C., Karl n, W., Maasch, K. A., Meeker, L. D., Meyerson,  
899 E. A., Gasse, F., Kreveld, S. van, Holmgren, K., Lee-Thorp, J., Rosqvist, G., Rack, F., Staubwasser,  
900 M., Schneider, R. R. and Steig, E. J.: Holocene climate variability, Quat. Res., 62(3), 243–255,  
901 doi:<https://doi.org/10.1016/j.yqres.2004.07.001>, 2004.
- 902 Morell n, M., Valero-Garc s, B., Vegas-Vilarr bia, T., Gonz lez-Samp riz, P., Romero,  .,  
903 Delgado-Huertas, A., Mata, P., Moreno, A., Rico, M. and Corella, J. P.: Lateglacial and Holocene  
904 palaeohydrology in the western Mediterranean region: The Lake Estanya record (NE Spain),  
905 Quat. Sci. Rev., 28(25–26), 2582–2599, doi:<https://doi.org/10.1016/j.quascirev.2009.05.014>,





- 906 2009.
- 907 Morellón, M., Valero-Garcés, B., González-Sampériz, P., Vegas-Vilarrúbia, T., Rubio, E.,  
908 Rieradevall, M., Delgado-Huertas, A., Mata, P., Romero, Ó., Engstrom, D. R., López-Vicente, M.,  
909 Navas, A. and Soto, J.: Climate changes and human activities recorded in the sediments of Lake  
910 Estanya (NE Spain) during the Medieval Warm Period and Little Ice Age, *J. Paleolimnol.*, 46(3),  
911 423–452, doi:10.1007/s10933-009-9346-3, 2011.
- 912 Moreno, A., Cacho, I., Canals, M., Grimalt, J. O., Sánchez-Goñi, M. F., Shackleton, N. and Sierro,  
913 F. J.: Links between marine and atmospheric processes oscillating on a millennial time-scale. A  
914 multi-proxy study of the last 50,000 yr from the Alboran Sea (Western Mediterranean Sea),  
915 *Quat. Sci. Rev.*, 24(14–15), 1623–1636, doi:<https://doi.org/10.1016/j.quascirev.2004.06.018>,  
916 2005.
- 917 Moreno, A., Pérez, A., Frigola, J., Nieto-Moreno, V., Rodrigo-Gámiz, M., Martrat, B., González-  
918 Sampériz, P., Morellón, M., Martín-Puertas, C., Corella, J. P., Belmonte, Á., Sancho, C., Cacho, I.,  
919 Herrera, G., Canals, M., Grimalt, J. O., Jiménez-Espejo, F., Martínez-Ruiz, F., Vegas-Vilarrúbia, T.  
920 and Valero-Garcés, B. L.: The Medieval Climate Anomaly in the Iberian Peninsula reconstructed  
921 from marine and lake records, *Quat. Sci. Rev.*, 43, 16–32,  
922 doi:<https://doi.org/10.1016/j.quascirev.2012.04.007>, 2012.
- 923 Nestares, T. and Torres, T. de: Un nuevo sondeo de investigación paleoambiental del  
924 Pleistoceno y Holoceno en la turbera del Padul (Granada, Andalucía). *Geogaceta* 23, 99–102.,  
925 1997.
- 926 Olsen, J., Anderson, N. J. and Knudsen, M. F.: Variability of the North Atlantic Oscillation over  
927 the past 5,200 years, *Nat. Geosci.*, 5(11), 808–812, doi:10.1038/ngeo1589, 2012.
- 928 Ortiz, J. E., Torres, T., Delgado, A., Julià, R., Lucini, M., Llamas, F. J., Reyes, E., Soler, V. and Valle,  
929 M.: The palaeoenvironmental and palaeohydrological evolution of Padul Peat Bog (Granada,  
930 Spain) over one million years, from elemental, isotopic and molecular organic geochemical  
931 proxies, *Org. Geochem.*, 35(11–12), 1243–1260,  
932 doi:<https://doi.org/10.1016/j.orggeochem.2004.05.013>, 2004.
- 933 Paillard, D., Labeyrie, L. and Yiou, P.: Macintosh Program performs time-series analysis, *Eos*  
934 *Trans. Am. Geophys. Union*, 77(39), 379–379, doi:10.1029/96EO00259, 1996.
- 935 Pérez Raya, F. and López Nieto, J.: Vegetación acuática y helofítica de la depresión de Padul  
936 (Granada), *Acta Bot Malacit.*, 16(2), 373–389, 1991.
- 937 Pons, A. and Reille, M.: The holocene- and upper pleistocene pollen record from Padul  
938 (Granada, Spain): A new study, *Palaeogeogr. Palaeoclimatol. Palaeoecol.*, 66(3), 243–263,  
939 doi:[http://dx.doi.org/10.1016/0031-0182\(88\)90202-7](http://dx.doi.org/10.1016/0031-0182(88)90202-7), 1988.
- 940 Ramos-Román, M. J., Jiménez-Moreno, G., Anderson, R. S., García-Alix, A., Toney, J. L., Jiménez-  
941 Espejo, F. J. and Carrión, J. S.: Centennial-scale vegetation and North Atlantic Oscillation



- 942 changes during the Late Holocene in the southern Iberia, *Quat. Sci. Rev.*, 143, 84–95,  
943 doi:<https://doi.org/10.1016/j.quascirev.2016.05.007>, 2016.
- 944 Reimer, P. J., Bard, E., Bayliss, A., Beck, J. W., Blackwell, P. G., Ramsey, C. B., Buck, C. E., Cheng,  
945 H., Edwards, R. L., Friedrich, M., Grootes, P. M., Guilderson, T. P., Haflidason, H., Hajdas, I.,  
946 Hatté, C., Heaton, T. J., Hoffmann, D. L., Hogg, A. G., Hughen, K. A., Kaiser, K. F., Kromer, B.,  
947 Manning, S. W., Niu, M., Reimer, R. W., Richards, D. A., Scott, E. M., Southon, J. R., Staff, R. A.,  
948 Turney, C. S. M. and van der Plicht, J.: IntCal13 and Marine13 Radiocarbon Age Calibration  
949 Curves 0–50,000 Years cal BP, *Radiocarbon*, 55(4), 1869–1887, doi:10.2458/azu\_js\_rc.55.16947,  
950 2013.
- 951 Riera, S., Wansard, G. and Julià, R.: 2000-year environmental history of a karstic lake in the  
952 Mediterranean Pre-Pyrenees: the Estanya lakes (Spain), *{CATENA}*, 55(3), 293–324,  
953 doi:[https://doi.org/10.1016/S0341-8162\(03\)00107-3](https://doi.org/10.1016/S0341-8162(03)00107-3), 2004.
- 954 Riera, S., López-Sáez, J. A. and Julià, R.: Lake responses to historical land use changes in  
955 northern Spain: The contribution of non-pollen palynomorphs in a multiproxy study, *Rev.*  
956 *Palaeobot. Palynol.*, 141(1–2), 127–137, doi:<https://doi.org/10.1016/j.revpalbo.2006.03.014>,  
957 2006.
- 958 Rodrigo-Gámiz, M., Martínez-Ruiz, F., Rodríguez-Tovar, F. J., Jiménez-Espejo, F. J. and Pardo-  
959 Igúzquiza, E.: Millennial- to centennial-scale climate periodicities and forcing mechanisms in the  
960 westernmost Mediterranean for the past 20,000 yr, *Quat. Res.*, 81(1), 78–93,  
961 doi:<https://doi.org/10.1016/j.yqres.2013.10.009>, 2014.
- 962 Sanz de Galdeano, C., El Hamdouni, R. and Chacón, J.: Neotectónica de la fosa del Padul y del  
963 Valle de Lecrín, *Itiner. Geomorfológicos Por Andal. Orient. Publicacions Univ. Barc. Barc.*, 65–81,  
964 1998.
- 965 Schulz, M. and Mudelsee, M.: REDFIT: estimating red-noise spectra directly from unevenly  
966 spaced paleoclimatic time series, *Comput. Geosci.*, 28(3), 421–426,  
967 doi:[https://doi.org/10.1016/S0098-3004\(01\)00044-9](https://doi.org/10.1016/S0098-3004(01)00044-9), 2002.
- 968 Sicre, M.-A., Jalali, B., Martrat, B., Schmidt, S., Bassetti, M.-A. and Kallel, N.: Sea surface  
969 temperature variability in the North Western Mediterranean Sea (Gulf of Lion) during the  
970 Common Era, *Earth Planet. Sci. Lett.*, 456, 124–133,  
971 doi:<http://dx.doi.org/10.1016/j.epsl.2016.09.032>, 2016.
- 972 Steinhilber, F., Beer, J. and Fröhlich, C.: Total solar irradiance during the Holocene, *Geophys.*  
973 *Res. Lett.*, 36(19), n/a–n/a, doi:10.1029/2009GL040142, 2009.
- 974 Trouet, V., Esper, J., Graham, N. E., Baker, A., Scourse, J. D. and Frank, D. C.: Persistent Positive  
975 North Atlantic Oscillation Mode Dominated the Medieval Climate Anomaly, *Science*, 324(5923),  
976 78, doi:10.1126/science.1166349, 2009.
- 977 Valle, F.: Mapa de series de vegetación de Andalucía 1: 400 000, Editorial Rueda., 2003.



978 Villegas Molina, F.: Laguna de Padul: Evolución geológico-histórica, Estud. Geográficos, 28(109),  
979 561, 1967.

980 Zanchettin, D., Rubino, A., Traverso, P. and Tomasino, M.: Impact of variations in solar activity  
981 on hydrological decadal patterns in northern Italy, J. Geophys. Res. Atmospheres, 113(D12),  
982 n/a–n/a, doi:10.1029/2007JD009157, 2008.

983  
984

985

986

987

988

989

990

991

992

993

994

995

996

997

998

999

1000

1001

1002

1003

1004

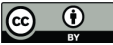

1005 **Figures and tables**

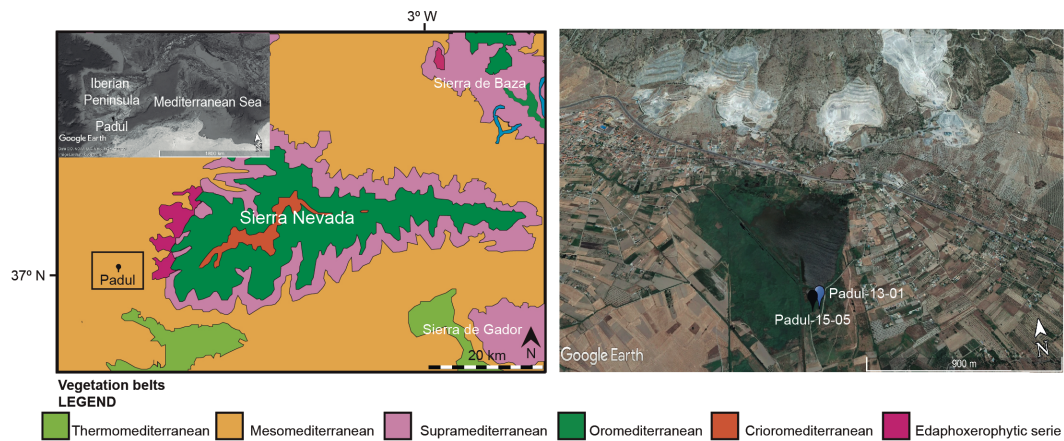

1006  
1007 **Figure 1.** Location of Padul peat bog in Sierra Nevada National Park, southern Iberian  
1008 Peninsula. Panel on the left is the map of the vegetation belts in the Sierra Nevada (Modified  
1009 from REDIAM. Map of the vegetation series of Andalusia:  
1010 [http://laboratoriorediam.cica.es/VisorGenerico/?tipo=WMS&url=http://www.juntadeandalucia.es/medioambiente/mapwms/REDIAM\\_Series\\_Vegetacion\\_Andalusia?](http://laboratoriorediam.cica.es/VisorGenerico/?tipo=WMS&url=http://www.juntadeandalucia.es/medioambiente/mapwms/REDIAM_Series_Vegetacion_Andalusia?)). The inset map is the  
1011 Google earth image of the Iberian Peninsula in the Mediterranean region. Panel on the right is  
1012 the Google earth image (<http://www.google.com/earth/index.html>) of Padul peat bog area  
1013 showing the coring locations.  
1014

1015

1016

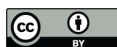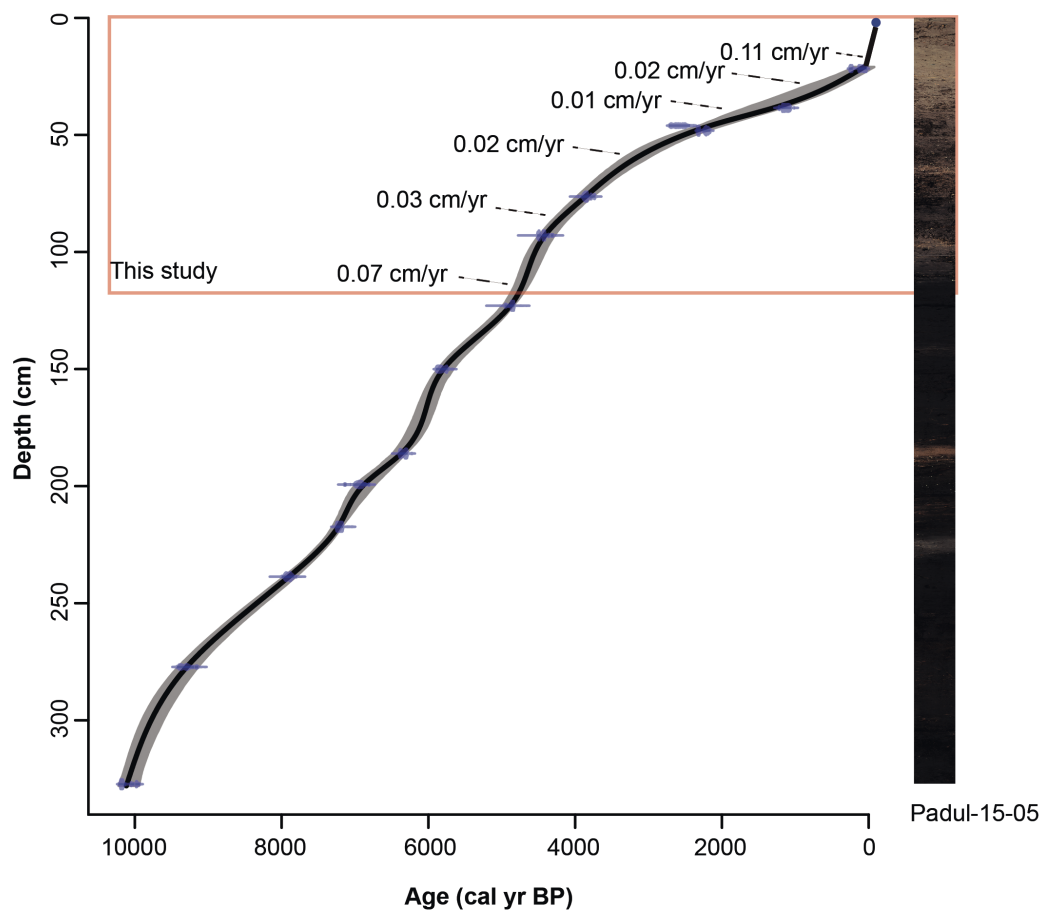

1017

1018 **Figure 2.** Photo of the Padul-15-05 sediment core with the age-depth model showing the part of  
 1019 the record that was studied here (red rectangle). The sediment accumulation rates (SAR) between  
 1020 individual segments are marked. See the body of the text for the explanation of the age  
 1021 reconstructions.

1022

1023



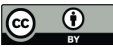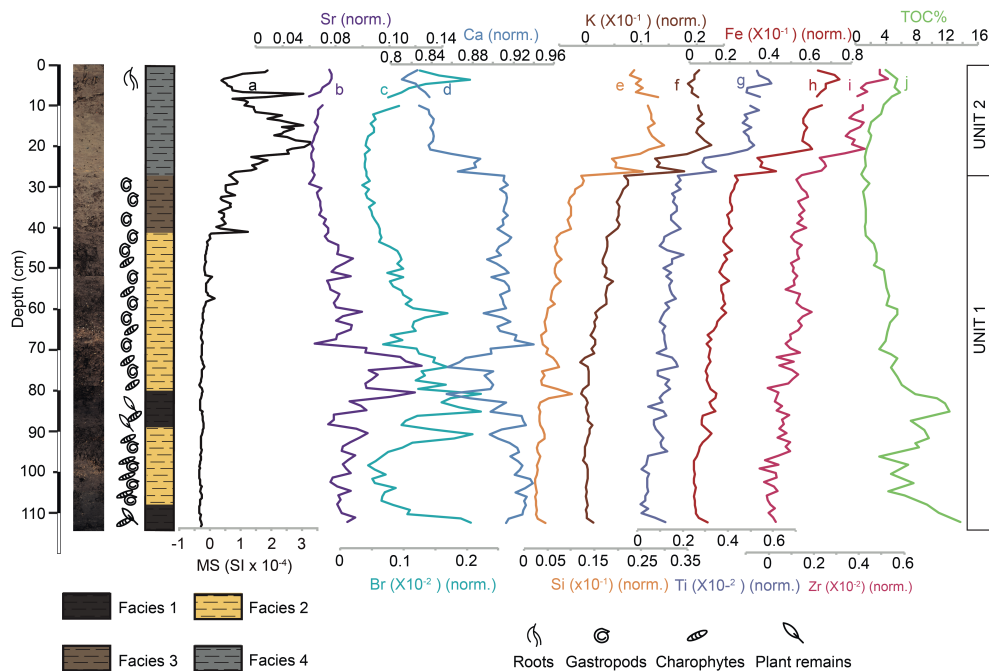

**Figure 3.** Lithology, facies interpretation with paleontology, magnetic susceptibility (MS), and geochemical (X-ray fluorescence (XRF) and total organic carbon (TOC) data from the Padul-15-05 record. XRF elements are represented normalized by the total counts. (a) Magnetic susceptibility (MS; SI). (b) Strontium normalized (Sr; norm.). (c) Bromine norm. (Br; norm.). (d) Calcium normalized. (Ca; norm.). (e) Silica normalized (Si; norm.). (f) Potassium normalized (K; norm.). (g) Titanium normalized (Ti; norm.). (h) Iron normalized (Fe; norm.). (i) Zirconium normalized (Zr; norm.). (j) Total organic carbon (TOC %).

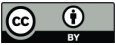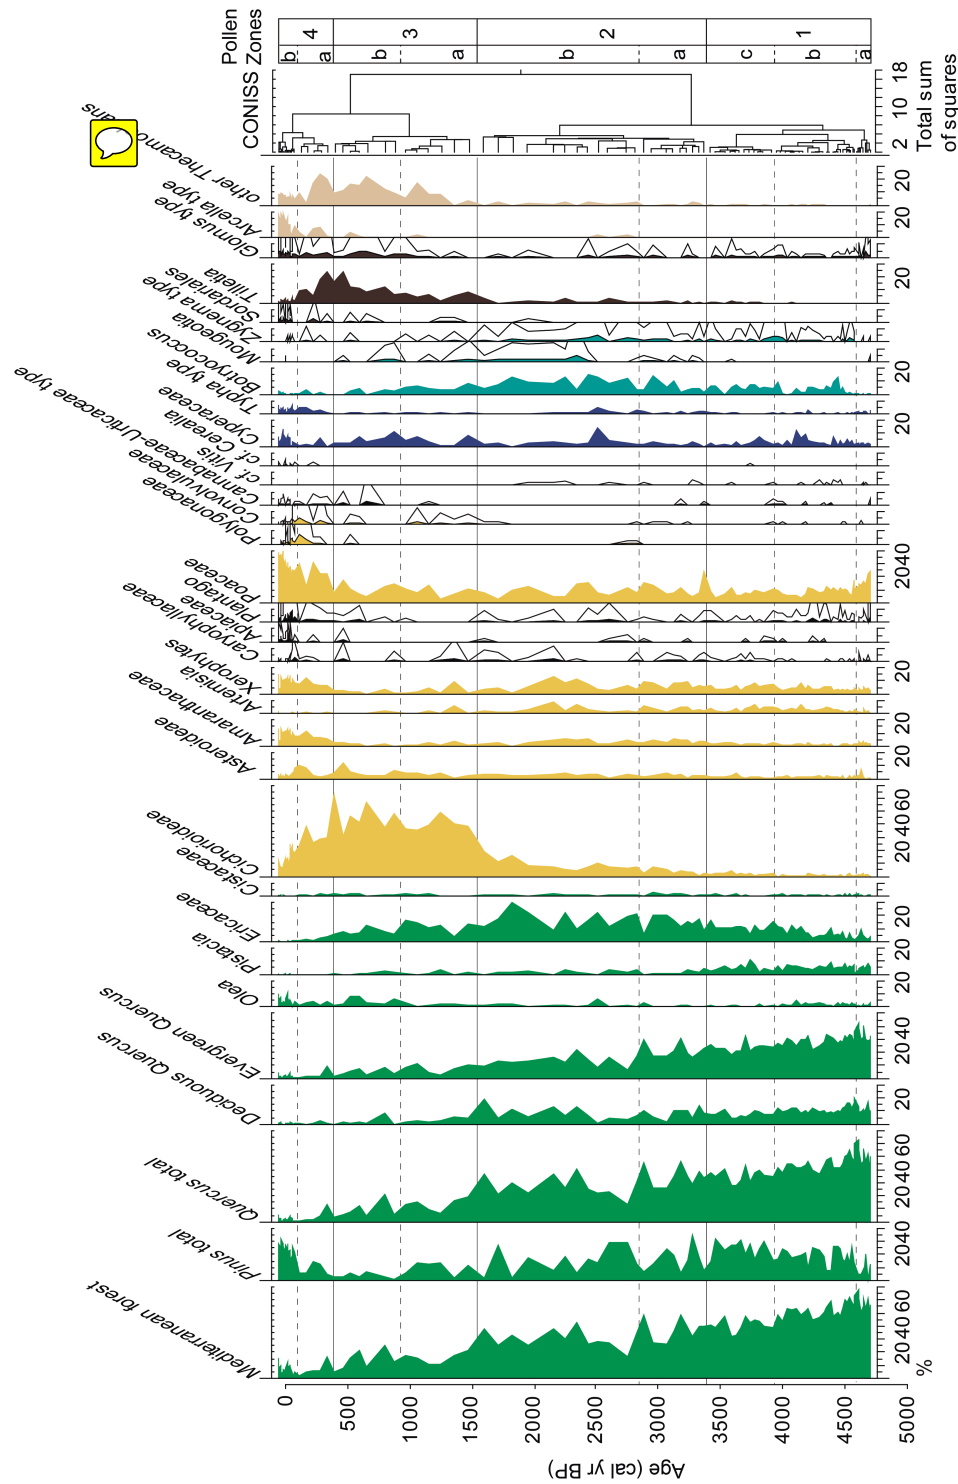



1041 **Figure 4.** Percentages of selected pollen taxa and non-pollen palynomorphs (NPPs) from the  
1042 Padul-15-05 record, represented with respect to terrestrial pollen sum. Silhouettes show 7-time  
1043 exaggerations of pollen percentages. Pollen zonation is shown on the right. Tree and shrubs are  
1044 showing in green, herbs and grasses in yellow, aquatics in dark blue, algae in blue, fungi in  
1045 brown and thecamoebians in beige. The Mediterranean forest taxa is composed of *Quercus* total,  
1046 *Olea*, *Phillyrea* and *Pistacia*. The xerophyte group includes *Artemisia*, *Ephedra*, and  
1047 *Amaranthaceae*.

1048

1049

1050

1051

1052

1053

1054

1055

1056

1057

1058

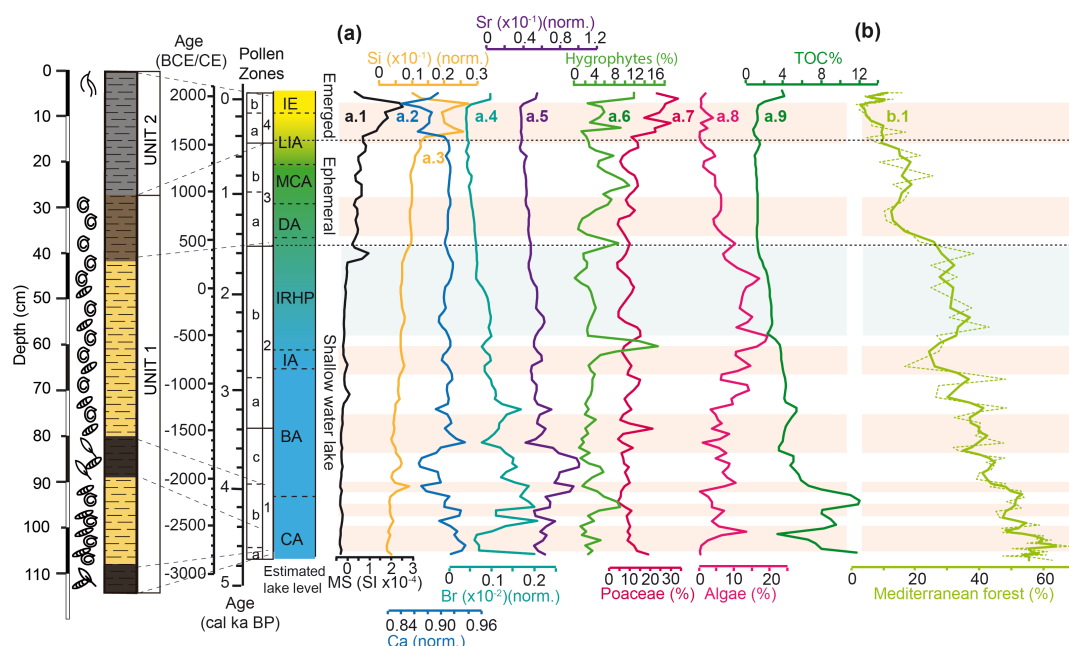

1059

**Figure 5.** Estimated lake level evolution and regional palynological component from the last ca. 4700 yr based on the synthesis of determinate proxies from the Padul-15-05 record: (a) Proxies used to estimate the water table evolution from the Padul-15-05 record (proxies were resampled at 50 yr (lineal interpolation) using Past software [http://palaeo-electronica.org/2001\\_1/past/issue1\\_01.htm](http://palaeo-electronica.org/2001_1/past/issue1_01.htm)). [(a.1) Magnetic Susceptibility (MS) in SI; (a.2) Silica normalized (Si; norm.); (a.3) Calcium normalized (Ca; norm.); (a.4) Bromine normalized (Br; norm.); (a.5) Strontium normalized (Sr; norm.); (a.6) Hygrophytes (%); (a.7) Poaceae (%); (a.8) Algae (%) (a.9) Total organic carbon (TOC %) ] (b) Mediterranean forest taxa, with a smoothing of three-point in bold. Pink and blue shading indicates Holocene arid and humid regionally events, respectively. See the body of the text for the explanation of the lake level reconstruction. Mediterranean forest smoothing was made using Analyseries software (Paillard et al., 1996). CA = Copper Age; BA = Bronze Age; IA = Iron Age; IRHP = Iberian Roman Humid Period; DA = Dark Ages; MCA = Medieval Climate Anomaly; LIA = Little Ice Age; IE = Industrial Era.

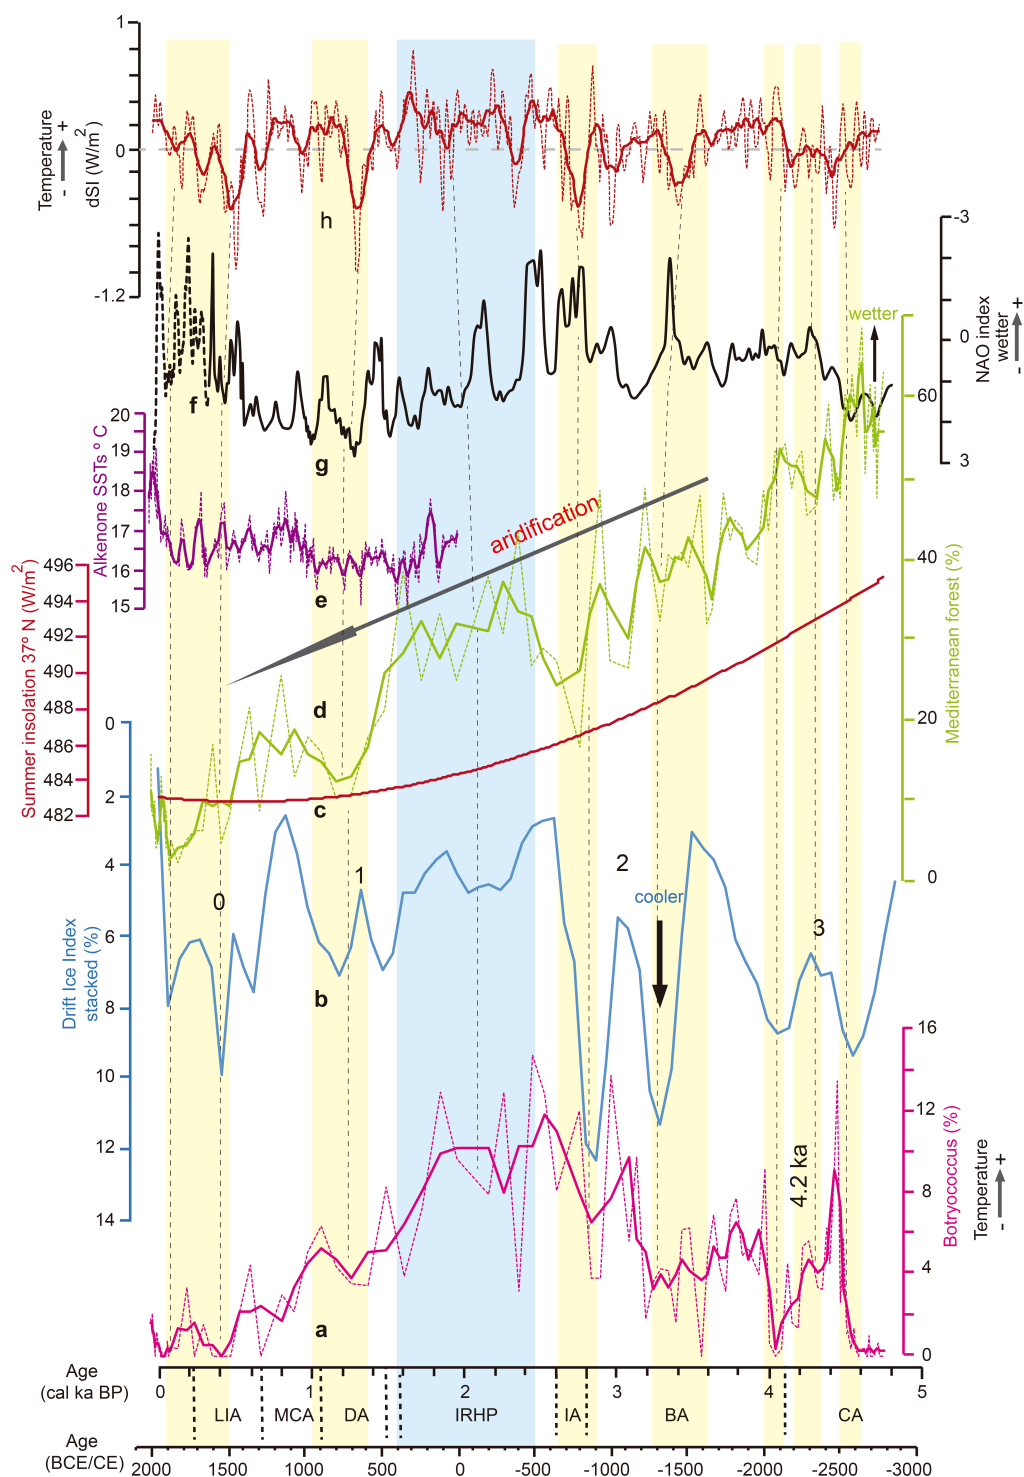





**Figure 6.** Comparison of the last ca. 4700 yr between different pollen taxa from the Padul-15-05 record, summer insolation for the Sierra Nevada latitude, eastern Mediterranean humidity and North Atlantic temperature. (a) *Botryococcus* from the Padul-15-05 record, with a smoothing of three-point in bold (this study). (b) Drift Ice Index (reversed) from the North Atlantic (Bond et al., 2001). (c) Summer insolation calculated for 37° N (Laskar et al., 2004). (d) Mediterranean forest taxa from the Padul-15-05 record, with a smoothing of three-point in bold (this study). (e) Alkenone-SSTs from the Gulf of Lion (Sicre et al., 2016), with a smoothing of four-point in bold. (f) North Atlantic Oscillation (NAO) index from a climate proxy reconstruction from Morocco and Scotland (Trouet et al., 2009). (g) North Atlantic Oscillation (NAO) index (reversed) from a climate proxy reconstruction from Greenland (Olsen et al., 2012). (h) Total solar irradiance reconstruction from cosmogenic radionuclide from a Greenland ice core (Steinhilber et al., 2009), with a smoothing of twenty-one-point in bold. Yellow and blue shading correspond with arid (and cold) and humid (and warm) periods, respectively. Grey dash lines show a tentative correlation between arid and cold conditions and the decrease in the Mediterranean forest and *Botryococcus*. Mediterranean forest, *Botryococcus* and solar irradiance smoothing was made using Analyseries software (Paillard et al., 1996), Alkenone-SSTs smoothing was made using Past software ([http://palaeo-electronica.org/2001\\_1/past/issue1\\_01.htm](http://palaeo-electronica.org/2001_1/past/issue1_01.htm)). A linear  $r$  (Pearson) correlation was calculated between *Botryococcus* (detrended) and Drift Ice Index (Bond et al., 2001;  $r = -0.63$ ;  $p < 0.0001$ ; between ca. 4700 to 1500 cal ka BP –  $r = -0.48$ ;  $p < 0.0001$  between 4700 and -65 cal yr BP). Previously, the data were detrended (only in *Botryococcus*), resampled at 70-yr (linear interpolation) in order to obtain equally spaced time series and smoothed to three-point average. CA = Copper Age; BA = Bronze Age; IA = Iron Age; IRHP = Iberian Roman Humid Period; DA = Dark Ages; MCA = Medieval Climate Anomaly; LIA = Little Ice Age; IE = Industrial Era.

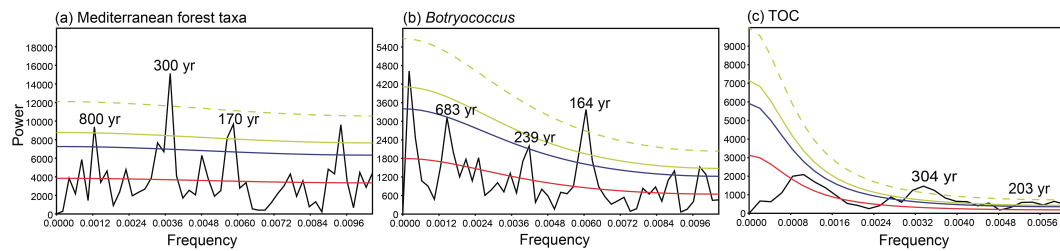

**Figure 7.** Spectral analysis of (a) Mediterranean forest taxa and (b) *Botryococcus* (mean sampling space = 47 yr) and (c) TOC (mean sampling space = 78 yr) from the Padul-15-05. The significant periodicities above confident level are shown. Confidence level 90 % (blue line), 95 % (green line), 99 % (green dash line) and AR (1) red noise (red line). Spectral analysis was made with Past software ([http://palaeo-electronica.org/2001\\_1/past/issue1\\_01.htm](http://palaeo-electronica.org/2001_1/past/issue1_01.htm)).



1130 **Table 1.** Age data for Padul-15-05 record. All ages were calibrated using R-code package ‘clam  
 1131 2.2’ employing the calibration curve IntelCal 13 (Reimer et al., 2013) at 95 % of confident range.

1132 \*Sample number assigned at radiocarbon laboratory

| Laboratory number | Core        | Material       | Depth (cm) | Age ( $^{14}\text{C}$ yr BP $\pm 1\sigma$ ) | Calibrated age (cal yr BP) 95 % confidence interval | Median age (cal yr BP) |
|-------------------|-------------|----------------|------------|---------------------------------------------|-----------------------------------------------------|------------------------|
| Reference ages    |             |                | 0          | 2015CE                                      | -65                                                 | -65                    |
| D-AMS 008531      | Padul-13-01 | Plant remains  | 21.67      | 103 $\pm$ 24                                | 23-264                                              | 127                    |
| Poz-77568         | Padul-15-05 | Org. bulk sed. | 38.46      | 1205 $\pm$ 30                               | 1014-1239                                           | 1130                   |
| BETA-437233       | Padul-15-05 | Plant remains  | 46.04      | 2480 $\pm$ 30                               | 2385-2722                                           | 2577                   |
| Poz-77569         | Padul-15-05 | Org. bulk sed. | 48.21      | 2255 $\pm$ 30                               | 2158-2344                                           | 2251                   |
| BETA-415830       | Padul-15-05 | Shell          | 71.36      | 3910 $\pm$ 30                               | 4248-4421                                           | 4343                   |
| BETA-437234       | Padul-15-05 | Plant remains  | 76.34      | 3550 $\pm$ 30                               | 3722-3956                                           | 3838                   |
| BETA-415831       | Padul-15-05 | Org. bulk sed. | 92.94      | 3960 $\pm$ 30                               | 4297-4519                                           | 4431                   |
| Poz-74344         | Padul-15-05 | Plant remains  | 122.96     | 4295 $\pm$ 35                               | 4827-4959                                           | 4871                   |
| BETA-415832       | Padul-15-05 | Plant remains  | 150.04     | 5050 $\pm$ 30                               | 5728-5900                                           | 5814                   |
| Poz-77571         | Padul-15-05 | Plant remains  | 186.08     | 5530 $\pm$ 40                               | 6281-6402                                           | 6341                   |
| Poz-74345         | Padul-15-05 | Plant remains  | 199.33     | 6080 $\pm$ 40                               | 6797-7154                                           | 6935                   |
| BETA-415833       | Padul-15-05 | Org. bulk sed. | 217.36     | 6270 $\pm$ 30                               | 7162-7262                                           | 7212                   |
| Poz-77572         | Padul-15-05 | Org. bulk sed. | 238.68     | 7080 $\pm$ 50                               | 7797-7999                                           | 7910                   |
| Poz-74347         | Padul-15-05 | Plant remains  | 277.24     | 8290 $\pm$ 40                               | 9138-9426                                           | 9293                   |
| BETA-415834       | Padul-15-05 | Plant remains  | 327.29     | 8960 $\pm$ 30                               | 9932-10221                                          | 10107                  |

1133

1134

1135

1136

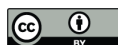

**Table 2.** Linear  $r$  (Pearson) correlation between geochemical elements from the Padul-15-05 record. Statistical treatment was performed using the Past software ([http://palaeo-electronica.org/2001\\_1/past/issue1\\_01.htm](http://palaeo-electronica.org/2001_1/past/issue1_01.htm)).

|    | Si       | K        | Ca        | Ti       | Fe       | Zr       | Br         | Sr       |
|----|----------|----------|-----------|----------|----------|----------|------------|----------|
| Si |          | 8.30E-80 | 2.87E-34  | 7.47E-60 | 3.22E-60 | 5.29E-44 | 0.001152   | 7.79E-09 |
| K  | 0.98612  |          | 7.07E-29  | 6.05E-60 | 8.20E-68 | 1.77E-51 | 0.00030317 | 5.38E-12 |
| Ca | -0.88096 | -0.84453 |           | 6.09E-42 | 5.81E-39 | 8.10E-34 | 0.35819    | 0.26613  |
| Ti | 0.96486  | 0.96501  | -0.91794  |          | 1.74E-74 | 1.12E-57 | 0.074223   | 8.88E-07 |
| Fe | 0.96546  | 0.97577  | -0.90527  | 0.98224  |          | 2.77E-66 | 0.051072   | 3.32E-08 |
| Zr | 0.92566  | 0.94789  | -0.8783   | 0.96109  | 0.97398  |          | 0.054274   | 7.16E-08 |
| Br | -0.31739 | -0.3506  | -0.091917 | -0.17755 | -0.19372 | -0.19116 |            | 4.03E-18 |
| Sr | -0.53347 | -0.61629 | 0.11113   | -0.46426 | -0.51386 | -0.50295 | 0.72852    |          |
